1 **Decreasing pdzd8-mediated mitochondrial-ER contacts in neurons**  
2 **improves fitness by increasing mitophagy**

3

4 Victoria L. Hewitt\*<sup>1,3</sup>, Leonor Miller-Fleming<sup>3</sup>, Simonetta Andreatza<sup>3</sup>, Francesca  
5 Mattedi<sup>4</sup>, Julien Prudent<sup>3</sup>, Franck Polleux<sup>1,2,5</sup>, Alessio Vagnoni<sup>4</sup> and Alexander J.  
6 Whitworth<sup>3</sup>

7

8 <sup>1</sup>Department of Neuroscience, Columbia University Medical Center New York, NY,  
9 USA

10 <sup>2</sup>Mortimer B. Zuckerman Mind Brain Behavior Institute, New York, NY, USA

11 <sup>3</sup>MRC Mitochondrial Biology Unit, University of Cambridge, Cambridge, UK

12 <sup>4</sup>Department of Basic and Clinical Neuroscience, Maurice Wohl Clinical Neuroscience  
13 Institute, IoPPN, King's College London, London, UK

14 <sup>5</sup>Kavli Institute for Brain Sciences, Columbia University Medical Center, New York,  
15 NY, USA

16

17 \* For correspondence [vlh2118@columbia.edu](mailto:vlh2118@columbia.edu)

18

## 19 **Abstract**

20 The complex cellular architecture of neurons combined with their longevity makes  
21 maintaining a healthy mitochondrial network particularly important and challenging.  
22 One of the many roles of mitochondrial-ER contact sites (MERCs) is to mediate  
23 mitochondrial quality control through regulating mitochondrial turn over. Pdzd8 is a  
24 newly discovered MERC protein, the organismal functions of which have not yet been  
25 explored. Here we identify and provide the first functional characterization of the  
26 *Drosophila melanogaster* ortholog of Pdzd8. We find that reducing pdzd8-mediated  
27 MERCs in neurons slows age-associated decline in locomotor activity and increases  
28 lifespan in *Drosophila*. The protective effects of pdzd8 knockdown in neurons correlate  
29 with an increase in mitophagy, suggesting that increased mitochondrial turnover may  
30 support healthy aging of neurons. In contrast, increasing MERCs by expressing a  
31 constitutive, synthetic ER-mitochondria tether disrupts mitochondrial transport and  
32 synapse formation, accelerates age-related decline in locomotion and reduces lifespan.  
33 We also show that depletion of pdzd8 rescues the locomotor defects characterizing an  
34 Alzheimer's disease (AD) fly model over-expressing Amyloid $\beta_{1-42}$  (A $\beta_{42}$ ) and  
35 prolongs the survival of flies fed with mitochondrial toxins. Together, our results  
36 provide the first *in vivo* evidence that MERCs mediated by the tethering protein pdzd8  
37 play a critical role in the regulation of mitochondrial quality control and neuronal  
38 homeostasis.

## 39 **Keywords**

40 Mitochondria, ER (Endoplasmic reticulum), organelle contact site, mitoQC, Amyloid  
41 beta, mitophagy, lifespan, *Drosophila melanogaster*, aging, neurodegeneration,  
42 healthspan, MERCs, Alzheimer's disease.

## 43 **Introduction**

44 Since the vast majority of neurons are postmitotic, maintaining functional neurons  
45 throughout an organism's lifetime requires tight regulation of organelle functions and  
46 stress responses. Mitochondria and the endoplasmic reticulum (ER) extend throughout  
47 neuronal processes including axons and dendrites, and both are vital and interdependent  
48 contributors to neuronal health (Wu *et al*, 2017). Mitochondria-ER contacts (MERCs)  
49 are controlled by a variety of contact site proteins and contribute to a range of functions  
50 required for proper development and maintenance of postmitotic neurons, including  
51 regulation of calcium homeostasis, lipid biogenesis, organelle reshaping and dynamics,  
52 and metabolic signalling (Giacomello & Pellegrini, 2016; Paillusson *et al*, 2016).  
53 Dysregulation of MERCs is particularly damaging to neurons as they are particularly  
54 susceptible to calcium overload, oxidative and ER stresses and to altered mitochondrial  
55 function, localization and transport (Lee *et al*, 2018a; Misgeld & Schwarz, 2017).

56  
57 As MERCs are modulated by a number of different protein complexes, the detrimental  
58 effects of dysregulation of MERCs are varied due to the diversity of these contact site  
59 functions (Martino Adami *et al*, 2019). The critical function of MERCs in regulating  
60 cellular responses to damage and stress is underscored by the finding that many human  
61 patient cellular models and animal models of age-related neurodegenerative diseases  
62 have been shown to have disrupted MERCs. Both reduced MERCs (De Vos &  
63 Hafezparast; Sepulveda-Falla *et al*, 2014) and increased MERCs (Area-Gomez *et al*,  
64 2012; Gómez-Suaga *et al*, 2019; Zampese *et al*, 2011) have been implicated in  
65 neurodegenerative diseases. Consequently, there is still little consensus on how altered  
66 MERCs contribute to neurodegeneration, even within a single disease model

67 (Erpapazoglou *et al*, 2017). The various functions of MERCs make it likely that  
68 multiple mechanisms might be involved and, with an ever-expanding toolkit, we can  
69 now better define the molecular identities and specific functions of ER-mitochondria  
70 tethering complexes and begin to unify many of the seemingly conflicting discoveries  
71 in this rapidly growing field (Csordas *et al*, 2018).

72  
73 Pdzd8 is one of the most recently discovered proteins that mediates mammalian  
74 MERCs (Hirabayashi *et al*, 2017) and is a paralog of Mmm1 (Wideman *et al*, 2018), a  
75 component of the fungal-specific ER mitochondria encounter structure (ERMES) and  
76 first MERC complex identified (Kornmann *et al*, 2009). We used *Drosophila*  
77 *melanogaster* to study the consequences of neuronal depletion of pdzd8 both at the  
78 cellular and at the organismal level. Importantly, we also describe how the phenotypes  
79 associated with neuron-specific depletion of pdzd8 change with age and may contribute  
80 to healthy aging. We show the MERCs mediated by the pdzd8 tethering protein regulate  
81 mitochondrial turnover through mitophagy and that reducing these contacts prolonged  
82 locomotor activity and lifespan in *Drosophila melanogaster*.

83

## 84 **Results**

85

### 86 **Characterization of fly pdzd8**

87 The *Drosophila melanogaster* gene *CG10362* encodes an uncharacterized protein in  
88 the PDZK8 family (Lee & Hong, 2006). *CG10362* has a similar predicted domain  
89 structure to mammalian Pdzd8 (Figure 1A). Expression of *CG10362* in flies is low but  
90 is most highly expressed in the central nervous system (FlyAtlas 2; Figure S1A)(Leader  
91 *et al*, 2018) and is enriched in neurons over glia (Figure S1B) (Davie *et al*, 2018). This  
92 specificity in expression in *Drosophila* provided an excellent opportunity to explore the  
93 neuronal functions of this newly discovered MERC protein and also to investigate the  
94 functional relevance of MERCs in adult and aging neurons. We propose that *CG10362*  
95 encodes the fly ortholog of mammalian Pdzd8 and, based on the data presented in this  
96 paper, we propose to name it *pdzd8*.

97

98 To characterize the function of pdzd8 in flies, we used the UAS-GAL4 system to  
99 manipulate its expression (Brand & Perrimon, 1993). Ubiquitous expression of an  
100 RNAi construct targeting *pdzd8* strongly reduces its mRNA levels in larvae (Figure  
101 S1C). To establish that MERCs were decreased in neurons expressing *pdzd8*-RNAi, we  
102 analysed adult fly brains by transmission electron microscopy (TEM) and manually  
103 identified contacts between ER and mitochondria (Figure 1B). Accordingly, the  
104 proportion of mitochondria in the soma of adult fly neurons in contact with ER is  
105 reduced in flies expressing *pdzd8*-RNAi (Figure 1C and S1F).

106

107 To confirm that *pdzd8*-RNAi reduces MERCs in axons as well as soma, we adapted the  
108 recently developed MERC quantification tool, a split-GFP-based contact site sensor  
109 (SPLICS) (Cieri *et al*, 2017) to create a SPLICS transgenic reporter line. The SPLICS  
110 construct targets  $\beta$ -strands 1-10 of GFP to the mitochondrial outer membrane and  $\beta$ -  
111 strand 11 to the ER membrane, and where these membranes are in close proximity  
112 fluorescent puncta are produced by reconstitution of the split-GFP (Figure S2A). To  
113 validate this tool in *Drosophila*, we expressed SPLICS in motor neurons (Figure S2B)  
114 and compared the number of puncta in control axons and those expressing a well  
115 characterized artificial ER-mitochondrial tether developed by Csordas *et al*. (Basso *et*

116 *al*, 2018; Csordas *et al*, 2006). The tether construct induces formation of ~5 nm MERCs  
117 through transmembrane domains that anchor it in both the mitochondrial outer  
118 membrane and the ER (Figure S2C). The density of SPLICS puncta in the axons  
119 expressing the tether was four times higher than controls (Figure S2D), indicating the  
120 SPLICS reporter was able to detect the increased MERCs resulting from synthetic  
121 tether expression in neurons *in vivo*.

122  
123 Using this SPLICS construct we also detected a significant decrease in the density of  
124 SPLICS puncta in central larval axons (bundles projecting to segments A7 and A8)  
125 expressing the *pdzd8*-RNAi compared to *LacZ*-RNAi controls (Figure 1D-E). While  
126 *pdzd8* expression is low beyond the nervous system, ubiquitous knockdown of *pdzd8*  
127 also reduces the extent of MERCs measured by fluorescence colocalization of ER and  
128 mitochondrial signals by super-resolution microscopy (structured illumination  
129 microscopy, SIM) in larval epidermal cells (Figure 1F-G and S1E), corroborating our  
130 results using TEM and SPLICS analysis.

131  
132 Consistent with the first reported function of Pdzd8 at MERCs in mouse neurons  
133 (Hirabayashi *et al*, 2017), we observed a reduced number of MERCs (Figure 1), but no  
134 obvious changes in mitochondrial or ER morphology in fly larval or adult neurons upon  
135 *pdzd8* knockdown (See Figures 1B, 1D, 1F, S1D-E, 4A-B, 4F-I, 5A and 5C). Together,  
136 these data show that *CG10362* encodes the *Drosophila* homolog of Pdzd8 and functions  
137 like mammalian Pdzd8 to regulate MERCs. We next sought to investigate the  
138 consequences of loss of *pdzd8* from neurons on organismal phenotypes.

139

#### 140 **Reduced mitochondria-ER contacts are protective in aging neurons**

141 Knockdown of *pdzd8* in fly neurons produces viable adults. There was no impact on  
142 the locomotor performance of pan-neuronal *pdzd8*-RNAi knockdown in young flies  
143 assessed in a climbing assay (Figure 2A). Surprisingly, we found that loss of *pdzd8*  
144 dramatically slowed the age-associated decline in locomotor activity assessed by the  
145 climbing assay (Figure 2A). Importantly, this effect was reproduced by motor neuron-  
146 specific *pdzd8* knockdown (Figure S3A). Strikingly, the increase in locomotor activity  
147 was accompanied by a significant increase in lifespan (Figure 2C).

148

149 In contrast, increasing MERCs by expression of a synthetic mitochondria-ER tether in  
150 all neurons resulted in a climbing defect in young flies and a significant acceleration of  
151 the age-related decline in climbing (Figure 2B), consistent with previous reports (Basso  
152 *et al*, 2018). This climbing defect was exacerbated with age (Figure 2B) and associated  
153 with a substantially reduced lifespan (Figure 2D). Consistent with these results,  
154 increased expression of *pdzd8* also resulted in decreased climbing ability with age  
155 (Figure S3B). Notably, this effect was suppressed by co-expression of the *pdzd8*-RNAi,  
156 further validating the specificity of this transgene (Figure S3B). Therefore, decreasing  
157 *pdzd8*-mediated MERCs in neurons prolonged lifespan and protected against  
158 locomotor decline with age, while increased MERCs in neurons were found to speed  
159 up the age-related decrease in locomotor activity and decreased lifespan.

160

#### 161 **Loss of neuronal *pdzd8* promotes survival in the presence of mitochondrial toxins**

162 To investigate how reduction of *pdzd8*-mediated MERCs improved fitness i.e.  
163 prevented age-related decline in locomotor activity and increased lifespan, we assessed  
164 whether reducing *pdzd8* expression in neurons may protect from additional stresses  
165 during aging. We assessed lifespan in flies aged on food with limited nutrients (5 %



166 sucrose, 1 % agar), and found that in contrast to flies aged on a rich diet (Figure 2C),  
167 neuronal expression of *pdzd8*-RNAi no longer extended the lifespan in comparison to  
168 controls (Figure 3A). When an additional oxidative stress was introduced by adding  
169 hydrogen peroxide to the food, the flies expressing *pdzd8*-RNAi died faster than  
170 controls (Figure 3B). Therefore, in the presence of general stresses, *pdzd8*-RNAi is also  
171 not protective.

172  
173 Due to the function of *pdzd8* at MERCs, we examined whether the protective effects  
174 caused by the *pdzd8* depletion in neurons were associated with mitochondrial damage.  
175 To address this, we fed the flies mitochondrial toxins: Rotenone, a complex I inhibitor  
176 or antimycin A, a complex III inhibitor, both block the electron transport chain and  
177 result in dysfunctional mitochondria. Reducing *pdzd8* levels in neurons significantly  
178 prolonged the survival of flies fed with mitochondrial toxins rotenone (Figure 3C) or  
179 antimycin A (Figure 3D) compared to control flies. As improved mitochondrial  
180 function could also contribute to the protective effects of loss of *pdzd8* in neurons we  
181 measured ATP levels in young or aged fly heads expressing *pdzd8*-RNAi but found no  
182 significant differences (Figure S3D). These results indicated that neuronal loss of *pdzd8*  
183 protects flies from damage induced by mitochondrial toxins.

184

#### 185 **Modulating MERCs causes axonal transport and NMJ defects**

186 While mitochondrial motility is important for neuronal health, it remains an open  
187 question whether decline of mitochondrial transport in neurons contributes to aging  
188 (reviewed in (Mattedi and Vagnoni 2019)). We first tested the hypothesis that decreased  
189 ER-mitochondrial tethering contributes to the protective effect of *pdzd8*  
190 downregulation in aging through changes in mitochondrial motility. We examined the  
191 distribution and morphology of mitochondria in axons of CCAP efferent neurons (Park  
192 *et al.*, 2003). We found no significant change in mitochondrial length or density in larval  
193 axons when comparing control to *pdzd8*-RNAi or synthetic ER-mitochondria tether-  
194 expressing neurons (Figure 4A-C). However, increasing tethering dramatically  
195 decreased mitochondrial motility (Figure 4D-E). In contrast, knockdown of *pdzd8* to  
196 reduce MERCs had no effect on axonal transport in larvae (Figure 4D-E).

197

198 To better understand the effects of altered MERCs in neurons, we analysed the  
199 morphology of mitochondria located in 1s boutons of larval neuromuscular junctions  
200 (NMJs) on muscle 4. Knockdown of *pdzd8* led to smaller NMJs and a significant  
201 reduction of mitochondrial volume, but overall no change in mitochondrial density  
202 compared to control flies (Figure 4F-G), showing that mitochondria distribute normally  
203 in these smaller NMJs. Increased tethering, however, resulted in severely deformed  
204 NMJs (Figure S3C) and made NMJs type 1s and 1b synaptic boutons indistinguishable,  
205 making it impossible to quantify mitochondrial density in 1s boutons. Together, these  
206 results show that increasing tethering has dramatic and detrimental effects early in  
207 development but reduced tethering through *pdzd8*-RNAi expression has more limited  
208 effects during these early stages of neuronal development.

209

#### 210 **Reducing *pdzd8* expression increases mitophagy in aged neurons**

211 We hypothesized that the reduced sensitivity to mitochondrial toxins may be due to  
212 improved mitochondrial quality control mechanisms. Thus, we analysed the levels of  
213 mitophagy, the clearance of damaged mitochondria by autophagy, in these neurons  
214 using the mitoQC mitophagy reporter (Allen *et al.*, 2013; Lee *et al.*, 2018b). This reporter  
215 is a pH-sensitive mCherry-GFP fusion targeted to the mitochondrial outer membrane

216 which provides a read out of mitophagy in the form of mCherry-only signal where the  
217 acidic lysosomal environment has quenched the GFP. Mitophagy was detected in the  
218 soma of nSyb-GAL4-expressing neurons in both larval and adult brains (Figure 5A and  
219 C). There was no significant difference in mitophagy levels in larval neurons expressing  
220 *pdzd8*-RNAi or control (Figure 5A-B). Quantification of mitoQC mCherry puncta did  
221 not indicate an age-dependent increase in mitophagy in the brains of control adults,  
222 however mitophagy was significantly increased in the brains of 20-day-old *pdzd8*-  
223 RNAi animals compared to controls (Fig 5C-D).

224

225 The majority of mitochondria in neurons are found in the neurites, so to examine  
226 mitophagy in axons of aged flies, we analysed mitoQC signal in axons of the adult fly  
227 wing *in situ* (Vagnoni & Bullock, 2016) (Figure 5E). Here, in contrast to the adult brain  
228 cell bodies, we did observe an age dependent increase in mitophagy in axons of control  
229 flies (Figure 5F). Consistent with our previous results, *pdzd8* knockdown further  
230 increased mitophagy in axons of aged flies (Figure 5E-F). Together, these results show  
231 that loss of *pdzd8* promotes the turnover of mitochondria in aging neurons.

232

### 233 **Reduced MERCs is protective in a fly model of Alzheimer's disease**

234 Our results indicate that the loss of *pdzd8* is protective against mitochondrial insults,  
235 prevents the age-related decrease in locomotion and increases lifespan. Since  
236 mitochondrial dysfunction is a common feature of many neurodegenerative diseases,  
237 and altered MERCs has been documented in some, we next sought to explore the  
238 neuroprotective potential of *pdzd8* depletion in an age-related neurodegenerative  
239 disease model. To test this, we turned to an Alzheimer's disease fly model where the  
240 expression of pathogenic A $\beta$ <sub>42</sub> has been shown to cause neural dysfunction, due in part  
241 to oxidative stress (Rival *et al*, 2009).

242

243 Since increased MERCs have also been associated with Alzheimer's disease (Area-  
244 Gomez *et al*, 2012; Del Prete *et al*, 2017), we first used the SPLICS reporter to  
245 determine the number of MERCs in larval axons. Consistent with other cellular and  
246 organismal models, flies expressing the A $\beta$ <sub>42</sub> showed an increase in SPLICS puncta,  
247 indicating MERCs are increased in axons of this model of Alzheimer's disease (Figure  
248 6A-B). Flies expressing A $\beta$ <sub>42</sub> in neurons exhibit a significant climbing defect in young  
249 flies that worsens rapidly with age (Figure 6C)(Crowther *et al*, 2005). However, pan-  
250 neuronal *pdzd8* knockdown in combination with A $\beta$ <sub>42</sub> was sufficient to substantially  
251 ameliorate the decline in locomotor activity observed in young and 10-day-old A $\beta$ <sub>42</sub>  
252 flies (Figure 6C). Thus, reducing *pdzd8*-mediated MERCs is protective in this  
253 progressive neurodegenerative disease model with increased MERCs.

## 254 **Discussion**

255

256 Here we have identified and characterized the putative *Drosophila* homolog of the  
257 newly discovered mammalian MERC tethering protein Pdzd8 (Hirabayashi *et al*,  
258 2017). The sequence divergence between Pdzd8 and its yeast paralog Mmm1 and the  
259 additional domains present in Pdzd8 (Wong & Levine, 2017), made the relationship  
260 between these paralogs difficult to identify (Wideman *et al*, 2018). While the conserved  
261 predicted domain structure strongly suggests *Drosophila* CG10362 encodes the fly  
262 homolog of mouse Pdzd8, the low, 21 % overall sequence identity of these proteins  
263 raises the interesting possibility of evolution of more species-specific functional  
264 specialisation.

265

266 Using RNAi, we characterized the effects of depletion of *pdzd8* in *Drosophila* with a  
267 focus on neurons where this protein is most highly expressed. Knockdown of *pdzd8*  
268 reduces contacts between the ER and mitochondria in epidermal cells measured using  
269 super resolution microscopy of ER and mitochondria labeled with fluorescent reporters,  
270 in motor neurons, monitored by the contact site reporter SPLICS, and in the soma of  
271 adult neurons using transmission electron microscopy. These data suggest that *pdzd8*,  
272 like its mammalian ortholog, functions as a tether between ER and mitochondria. The  
273 only other neuronally expressed tethering protein that has been characterized in flies is  
274 the *Drosophila* ortholog of Mfn2, Marf (Hwa *et al*, 2002). However, the analysis of  
275 Marf is complicated by its additional roles in mitochondrial and ER morphology  
276 (Debattisti *et al*, 2014; El Fissi *et al*, 2018; Sandoval *et al*, 2014). While mammalian  
277 Pdzd8 is expressed in a range of tissues (Hirabayashi *et al*, 2017), in flies, *pdzd8* mRNA  
278 expression is low outside the nervous system. Knockdown of *pdzd8* and expression of  
279 a synthetic tether therefore provided a unique opportunity to simply and selectively  
280 examine the function of MERCs in *Drosophila* neurons.

281

282 We found increased ER-mitochondrial tethering in neurons strongly impairs climbing  
283 ability and reduces lifespan of flies. Such detrimental effects are consistent with  
284 previous reports using this line (Basso *et al*, 2018). Other similar manipulations have  
285 also been shown to result in dopaminergic neuron loss (Lee *et al*, 2018c) and  
286 detrimental effects on sleep in ventral lateral neurons (Valadas *et al*, 2018). Here we  
287 also show highly abnormal NMJ development, with increased MERCs and smaller, but  
288 otherwise structurally intact NMJs upon *pdzd8* knockdown. The function of the yeast  
289 paralog Mmm1 and of its Synaptotagmin-like mitochondrial lipid-binding protein  
290 (SMP) domains, suggests that disruptions in lipid transfer due to less *pdzd8* might  
291 contribute to these developmental defects (Jeong *et al*, 2017; Kawano *et al*, 2018;  
292 Shirane *et al*, 2020), however whether lipid biogenesis defects could contribute to a  
293 protective effect of *pdzd8*-RNAi in neurons remains an open question.

294

295 Transport of mitochondria is intimately linked to the health of neurons, at least in the  
296 peripheral nervous system (De Vos *et al*, 2008; Harbauer, 2017; Misgeld & Schwarz,  
297 2017). Although there is some evidence that increased MERCs may be directly  
298 associated with decreased mitochondrial motility (Krols *et al*, 2018), this has not been  
299 shown in neurons which are particularly sensitive to mitochondrial transport imbalance  
300 (Maday *et al*, 2014). Our data suggests axonal mitochondrial transport defect  
301 contributes to the detrimental effects of increased tethering and adds to the evidence  
302 that efficient mitochondrial transport is essential for healthy aging neurons, as seen in  
303 many models of neurodegenerative motor disorders (Baldwin *et al*, 2016).

304

305 In contrast to the detrimental effects of increased tethering, reducing MERCs by  
306 knockdown of *pdzd8* in *Drosophila* neurons dramatically delayed age-associated  
307 decline in locomotor activity and significantly extended median lifespan compared to  
308 control animals. Since decline in mitochondrial transport is proposed to contribute to  
309 neuronal aging (Vagnoni & Bullock, 2018), we hypothesized that reducing tethering in  
310 the aging flies might be protective by allowing sustained mitochondrial motility  
311 (Mattedi & Vagnoni, 2019). However, we detected no change in the percentage of  
312 motile mitochondria in larval neurons with reduced *pdzd8* expression. Since  
313 knockdown of *pdzd8* also prolonged the survival of flies fed mitochondrial toxins, this  
314 suggests that the protective effects of reducing MERCs might instead be result from

315 more efficient clearance of the damaged mitochondria accumulating with age or more  
316 acutely by feeding flies mitochondrial toxins.

317

318 To explore the clearance of damaged mitochondria, we examined the age dependence  
319 of mitophagy using the mitoQC reporter. Clearance of damaged cellular components  
320 by autophagy is critical for the maintenance of healthy neurons with age (Stavoe &  
321 Holzbaur, 2019). More specifically, the clearance of damaged mitochondria via  
322 mitophagy is also thought to be a key factor in healthy aging of neurons (Ma *et al*, 2018;  
323 Pickrell & Youle, 2015; Whitworth & Pallanck, 2017). It remains unclear, however  
324 whether, increased or decreased mitophagy in neurons is protective during aging  
325 (Montava-Garriga & Ganley, 2020) and if specific neuronal populations are more  
326 susceptible to mitochondrial turnover. Studies examining mitophagy in aging brains  
327 have produced inconsistent results, with differences observed between brain regions  
328 and cell types (Cornelissen *et al*, 2018; Lee *et al*, 2018b; Sun *et al*, 2015). Consistent  
329 with our previous result in dopaminergic neurons (Lee *et al*, 2018b), we also did not  
330 detect any age-related change in mitophagy levels in the cell bodies in the brains of  
331 control flies.

332

333 There is accumulating evidence showing that axonal mitophagy occurs in cultured  
334 mammalian neurons (Ashrafi *et al*, 2014; Zheng *et al*, 2019), but other results suggest  
335 axonal maintenance in flies may not require mitophagy (Cao *et al*, 2017). There is  
336 evidence of mitophagy *in vivo* in neurites in young mice (McWilliams *et al*, 2018;  
337 McWilliams *et al*, 2019), but mitoQC has not previously been used to detect mitophagy  
338 in neurites during aging (Cornelissen *et al*, 2018). Using mitoQC, we detected a  
339 significant amount of mitophagy in wing axons of control flies which increased with  
340 age. Our results suggest mitophagy in axon but not cell bodies increases with age, but  
341 future experiments should specifically examine variations in mitophagy with age across  
342 brain regions, cell types and even other subcellular compartments such as dendrites.

343

344 Here we provide the first *in vivo* evidence that mitophagy may be regulated by pdzd8-  
345 mediated MERCs. Mitophagy levels did not change in young flies with less pdzd8, but  
346 when aged, these flies displayed significant increases in mitophagy in both soma and  
347 axons. There is also accumulating evidence that defects in mitophagy contribute to the  
348 early stages of Alzheimer's disease (AD) (Kerr *et al*, 2017; Lee *et al*, 2019) and  
349 boosting mitophagy has been shown to be protective in worm and mouse AD models  
350 (Fang *et al*, 2019). Here we show increased MERCs in an AD fly model consistent with  
351 the altered MERCs identified in both patients and cell models of AD (Area-Gomez *et al*,  
352 2012). Expression of *pdzd8*-RNAi in the AD flies significantly slowed their age-  
353 associated decline in climbing, consistent with reduced MERCs allowing more efficient  
354 mitophagy and removal of damaged mitochondria.

355

356 Mitochondrial dysfunction and associated metabolic changes are considered a hallmark  
357 of aging (Lopez-Otin *et al*, 2013). Boosting mitophagy has been suggested to increase  
358 lifespan and protect animals from mitochondrial toxins in both *D. melanogaster*  
359 (Aparicio *et al*, 2019; Rana *et al*, 2017) and *C. elegans* (Palikaras *et al*, 2015). Early  
360 work on starvation induced autophagosome biogenesis showed MERCs could  
361 contribute to the formation of both the autophagosome (Hailey *et al*, 2010; Hamasaki  
362 *et al*, 2013) and the mitophagosome (Yang & Yang, 2013). As postmitotic, long-lived  
363 cells with complex morphologies, neurons require more careful regulation of



364 mitophagy than other cell types (Evans & Holzbaur, 2019), but the mechanisms that  
365 regulate this process in neurons are still poorly understood (Evans & Holzbaur, 2020).

366  
367 MERCs mediated by *pdzd8* may limit the rate of mitophagy, analogous to the protective  
368 role that mitochondrial fusion is thought to play during starvation-induced autophagy  
369 (Gomes *et al*, 2011; Rambold *et al*, 2011; Rana *et al*, 2017; Twig *et al*, 2008). Recently  
370 it was reported that increasing several different types of MERC proteins can slow toxin  
371 induced mitophagy in non-neuronal cultured cells (McLelland & Fon, 2018; McLelland  
372 *et al*, 2018). There is also some recent evidence that MERCs might be directly involved  
373 in regulation of mitophagy in neurons (Puri *et al*, 2019). *Pdzd8* has also been found to  
374 mediate contacts between the ER and lysosomes (Guillen-Samander *et al*, 2019) and  
375 three way contacts between the ER, mitochondria and late endosomes (Elbaz-Alon *et al*,  
376 2020; Shirane *et al*, 2020). This may indicate that *Pdzd8*, like other MERC proteins,  
377 can play multiple roles at different organelle contacts, or that *Pdzd8* is functional at  
378 three-way contacts between the ER, lysosomes and mitochondria (Wong *et al*, 2019).  
379 *Pdzd8* function at any of these contact sites could potentially alter mitophagy and future  
380 work should explore the mechanisms behind our observed increases in mitophagy.

381  
382 While our data suggests that increased mitophagy contributes to the protective effects  
383 of the loss of *pdzd8*-mediated MERCs, we have not ruled out contributions from the  
384 other specialized functional and signalling roles of MERCs in metabolic regulation,  
385 lipid biogenesis and calcium handling (Lee *et al*, 2018a; Rowland & Voeltz, 2012). The  
386 increased mitophagy we detected in aged neurons expressing *pdzd8*-RNAi correlates  
387 with improved survival and aged locomotor activity, suggesting that reducing the extent  
388 of *pdzd8*-mediated MERCs may facilitate more efficient mitophagy and removal of  
389 damaged mitochondria from aging neurons. We propose that reducing *pdzd8*-mediated  
390 MERCs may be protective in aging neurons by allowing more efficient turnover of  
391 mitochondria as damage accumulates with age. As regulators of mitophagy,  
392 manipulating MERCs may provide an avenue for enhanced mitochondrial quality  
393 control to help promote healthy aging of neurons.

## 394 **Methods**

### 395 **Husbandry**

396 Flies were raised under standard conditions at 25°C on food containing agar, cornmeal,  
397 molasses, malt extract, soya powder, propionic acid, nipagin and yeast in a 12 h:12 h  
398 light:dark cycle.

399

### 400 **Genetics**

401 *Drosophila* lines were obtained as indicated in Table 1, or generated as described  
402 below. All mutant lines used in this study were backcrossed to an isogenic *w*<sup>1118</sup> strain  
403 (RRID:BDSC\_6326), for 4-6 generations before use. For all integration events,  
404 multiple independent lines were initially isolated, verified by PCR and assessed for  
405 consistent effects before selecting a single line of each integration site for further study.  
406 Wherever possible inert UAS lines such as UAS-*LacZ*-RNAi and UAS-mitoCherry are  
407 used as dilution controls to ensure equal numbers of UAS constructs in control and  
408 experimental conditions. Unless otherwise stated male flies were used in all  
409 experiments.

410



411 **New lines**

412 **SPLICS**

413 The SPLICSs construct with an 8-10 nm range from Tito Cali & Marisa Brini (Cieri *et*  
414 *al.*, 2017), was amplified from pSYC-SPLICSs-P2A using  
415 (TAAGCAGCGGCCGCTGATTTAGGTGACACTATAG) and T7 forward primer  
416 (TAATACGACTCACTATAGGG) and cloned into pUAST-AttB between NotI and  
417 XbaI sites. Flies were injected by BestGene to insert into attP16 (II) and attP2 (8622,  
418 III) and the attP16 site gave better signal and so was used in this work. The number of  
419 puncta produced in the axon bundles driven by nSyb-GAL4 varied with a consistently  
420 more puncta than in the central axons bundles in the peripheral bundles (Fig S2B).

421 **pdzd8-HA**

422 pdzd8-HA was synthesized by Genewiz based on the cDNA Genbank sequence  
423 LD34222 (AY118553.1) (Sayers *et al.*, 2020), and cloned into pUAST.attB between  
424 EcoRI and XbaI. The University of Cambridge Department of Genetics Fly Facility  
425 generated lines by injection of this construct into the attP40 landing site.

426

427 **Climbing**

428 The startle induced negative geotaxis (climbing/locomotor) assay was performed as  
429 described previously (Andreazza *et al.*, 2019). Briefly, a maximum of 23 males were  
430 placed into the first tube of a countercurrent apparatus, tapped to the bottom, and given  
431 10 s to climb 10 cm. This procedure was repeated five times (five tubes), and the  
432 number of flies that has remained into each tube counted and the climbing performance  
433 expressed as a climbing index (Greene *et al.*, 2003). The same flies were aged and  
434 assayed again on the indicated days post-eclosion.

435

436 **Lifespan**

437 For lifespan experiments groups of approximately 20-25 males were collected with  
438 minimal time under anesthesia (CO<sub>2</sub>), placed into separate vials with food and  
439 maintained at 25°C. Flies were transferred into fresh vials every 2-3 days, and the  
440 number of dead flies were recorded. Percent survival was calculated using  
441 <https://flies.shinyapps.io/Rflies/>. To assess lifespan in a diet with restricted nutrients  
442 flies were raised in standard conditions then transferred to tubes containing food made  
443 from 5 % sucrose and 1 % agar and flipped every 2-3 days. Lifespans in the presence  
444 of mitochondrial toxins and hydrogen peroxide were also performed on food made from  
445 5 % sucrose and 1 % agar cooled to less than 50°C before adding toxin at 1:1000.  
446 Rotenone (Sigma R8875) was dissolved in DMSO (1 mM final concentration) and  
447 antimycin A (Sigma A8674) (4 µg/mL final concentration) dissolved in 70 % ethanol.  
448 Flies in toxin assays were starved for 5 h before being placed on food containing toxins.  
449 Flies in rotenone assays were monitored twice a day and flipped every two days. Flies  
450 in antimycin A assays were monitored three times a day and flipped every two days.

451

452 **Fluorescence Microscopy**

453 Imaging of larval axons was performed as described in (Wang & Schwarz, 2009) with  
454 the following variations: wandering third instar larvae were pinned at each end dorsal  
455 side up to a reusable Sylgard (Sigma 761028) coated slide using pins (Fine Science  
456 Tools FST26002-10) cut to ~5 mm and bent at 90°. The larvae were cut along the dorsal  
457 midline using micro-dissection scissors. Internal organs were removed with forceps  
458 without disturbing the ventral ganglion and motor neurons. Larvae were then covered  
459 in dissection solution (Godena *et al.*, 2014). The cuticle was then pulled back with four

460 additional pins. The anterior pin was adjusted to ensure axons are taut and as flat as  
461 possible for optimal image quality.

462

463 Movies were taken using a Nikon E800 microscope with a 60x water immersion lens  
464 (NA 1.0 Nikon Fluor WD 2.0) and an LED light source driven by Micromanager 1.4.22  
465 Freeware (Edelstein *et al*, 2014). A CMOS camera (01-OPTIMOS-F-M-16-C) was  
466 used to record 100 frames at a rate of 1 frame per 5 s (8 min 20 s total). Axons were  
467 imaged within 200  $\mu\text{m}$  of the ventral ganglion in the proximal portion of the axons and  
468 no longer than 1 h after dissection. Movies were converted into kymographs using Fiji  
469 (Schindelin *et al*, 2012) and mitochondrial motility quantified manually with the  
470 experimenter blinded to the condition.

471

472 For SPLICS imaging in axon bundles at least three ROI 50  $\mu\text{m}$  x 12  $\mu\text{m}$  were quantified  
473 per animal and averages for each larva were plotted. For SPLICS quantification puncta  
474 intensity varied considerably so blinded manual counting was used.

475

476 To image NMJs larvae were dissected as described above and fixed for 20 min in 4 %  
477 formaldehyde in PBS. After blocking for 1 h in 1 % BSA/0.3 % Triton X-100/PBS  
478 solution, anti-HRP was added at 1:500 and samples agitated gently overnight at 4°C.  
479 After three washes in 0.3 % Triton X-100/PBS at room temperature, samples were  
480 incubated with Alexa Fluor 594 at 1:500 for 1 h in 1% BSA/0.3% Triton X-100/PBS  
481 solution. Samples were then washed in 3x in PBS before being mounted in Prolong  
482 Diamond. NMJs were imaged on a Nikon Eclipse TiE inverted microscope with  
483 appropriate lasers using an Andor Dragonfly 500 confocal spinning disk system, using  
484 an iXon Ultra 888 EMCCD camera (Andor), coupled with Fusion software  
485 (Andor) using a 60x NA 1.49 objective. NMJs on muscle 4 from segments A3 and A4  
486 (NMJs on these segments are the same size (Nijhof *et al*, 2016)) were captured in Z  
487 stacks with 0.3  $\mu\text{m}$  step size and analysed using Imaris (x64 9.2.0) to determine NMJ  
488 volume, mitochondrial volume and mitochondrial number.

489

490 For MitoQC imaging, samples were fixed for 30 min in 4 % formaldehyde (16 % VWR  
491 100503) diluted in pH 7.0 PBS. Adult brains were mounted in Prolong Diamond  
492 Antifade Mountant (Thermofisher P36961) using spacers and imaged on a Carl Zeiss  
493 LSM880 confocal laser-scanning system on an Axio Observer Z1 microscope (Carl  
494 Zeiss), coupled with ZEN software (Carl Zeiss) using a 100x Plan-APOCHROMAT  
495 /1.4 oil DIC objective. Images are shown in false colour with magenta puncta  
496 representing mCherry signal indicating where the reporter is in an acidic environment  
497 of a lysosome and the GFP has been quenched (Allen *et al*, 2013).

498

499 Imaging of wings was performed as described in Vagnoni & Bullock (Vagnoni &  
500 Bullock, 2016). Briefly, flies were anaesthetized with CO<sub>2</sub>, and immobilised with their  
501 wings outstretched on a cover glass with a fine layer of Halocarbon oil (VWR). A  
502 second cover glass was then added on top of the fly to stabilize the sample. Live  
503 imaging in the wing nerves was performed using a Nikon spinning disk system  
504 essentially as described previously (Morotz *et al*, 2019). The mitoQC puncta were  
505 annotated with Fiji using the Cell Counter plugin and quantified with the experimenter  
506 blinded to the genotype.

507

508 For imaging of the larval epidermal cells, the larvae were dissected as described above  
509 but the nervous system was also removed before fixation. The samples were washed in

510 PBS and the muscles were then removed (Tenenbaum & Gavis, 2016). The dissected  
511 filets were mounted in Prolong Diamond Antifade Mountant using No. 1.5H High  
512 Precision Deckglaser cover slips and placed under a weight for 24 h. N-SIM (Nikon  
513 Structured Illumination Microscopy) imaging was performed on a Nikon Ti Eclipse  
514 with an Andor DU-897 X-5835 camera and SR Apo TIRF 100x (NA1.5) objective run  
515 using NIS-Elements 4.60. Images were analysed in Fiji (Schindelin *et al*, 2012) using  
516 the Coloc2 plugin.

517

### 518 **Transmission Electron Microscopy**

519 Transmission electron microscopy (TEM) was performed at Cambridge Advanced  
520 Imaging Center (CAIC). Brains of 2 day old adult flies were fixed in 2 %  
521 glutaraldehyde/ 2 % formaldehyde in 0.1 M sodium cacodylate buffer pH 7.4  
522 containing 2 mM CaCl<sub>2</sub> and 0.1 % Tween20 (based on method described in (Celardo  
523 *et al*, 2016)), overnight at 4°C. Samples were then washed 5x with 0.1 M sodium  
524 cacodylate buffer and then treated with osmium for 2 days at 4°C (1 % OsO<sub>4</sub>, 1.5 %  
525 potassium ferricyanide, 0.1 M sodium cacodylate buffer pH 7.4). Samples were then  
526 washed 5x in distilled water and treated with 0.1 % aqueous thiocarbohydrazide for 20  
527 min in the dark at room temperature. Samples were washed another 5x in distilled water  
528 then treated with osmium a second time for 1 h at room (2 % OsO<sub>4</sub> in distilled water).  
529 Samples were then washed another 5x in distilled water before being treated with uranyl  
530 acetate bulk stain for 3 days at 4°C (2 % uranyl acetate in 0.05 M maleate buffer pH  
531 5.5). After a final 5x wash in distilled water, samples were dehydrated in 50/70/95/100  
532 % ethanol, 3x in each for at least 5 min each. Dehydration was completed by two further  
533 treatments with 100 % dry ethanol, 2x in 100 % dry acetone and 3x in dry acetonitrile  
534 for at least 5 min each. Quetol resin mix (12 g Quetol 651, 15.7 g NSA, 5.7 g MNA,  
535 0.5 g benzyltrimethylamine) made with an equal volume of 100 % dry acetonitrile and  
536 samples placed in this mix for 2 h at room temperature. Samples were then incubated  
537 in pure Quetol resin mix for 5 days, exchanging the samples to fresh resin mix each  
538 day. After 5 days the brains were embedded in coffin moulds and cured at 60°C for at  
539 least 48 h. Ultrathin sections were cut on a Leica Ultracut E at 70 nm thickness. Sections  
540 were mounted on 400 mesh bare copper grids and viewed in a FEI Tecnai G20 electron  
541 microscope run at 200 keV using a 20 µm objective aperture. Quantification of the  
542 percentage of clearly identifiable mitochondria in contact with ER was performed  
543 manually as described in (Celardo *et al*, 2016) and the experimenter was blinded to the  
544 genotype.

545

546

### 547 **qPCR**

548 Five female wandering third instar larvae per sample were washed briefly in 1xPBS,  
549 placed in RNase free tubes and frozen on dry ice. Larvae were homogenized in Trizol  
550 and RNA isolated by phenol:chloroform extraction and isopropanol precipitation.  
551 DNase treatment using Invitrogen TURBO DNA-free rigorous procedure was  
552 performed before measuring RNA concentration with a Qubit<sup>®</sup> RNA HS Assay Kit  
553 (Molecular Probes, Life Technologies). Reverse transcription reactions used 1.32 µg of  
554 RNA using SuperScript III Reverse Transcriptase (Invitrogen) with Oligo(dT)23VN as  
555 per manufacturer's instructions. The resulting cDNA was used for qPCRs using  
556 PowerUp SybrGreen (Applied Biosystems A25742). Primers for pdzd8 were PDZD8-  
557 F TTCTGTTTGGCTTCTCCTGG, PDZD8-R TTGAGGAAGTGC GACTGATC  
558 designed using RealTime qPCR Assay Entry (idtdna.com). *aTub84B* (Fwd:  
559 TGGGCCCGTCTGGACCACAA, Rev: TCGCCGTCACCGGAGTCCAT), *vkg* (Fwd:

560 CGAGGATGTTACCCAGAGATC, Rev: TCGTCCCTTGATTCCTTTG), *COX8*  
 561 (Fwd: CAGAGCCGTTGCCAGTC, Rev: CTTGTCGCCCTTGATGATCC), and *Rpl32*  
 562 (Fwd: AAACGCGGTTCTGCATGAG, Rev: GCCGCTTCAAGGGACAGTATCTG)  
 563 were used as housekeeping genes with their values combined to compare knockdown  
 564 to the geometric mean (Taylor *et al*, 2019).  
 565

#### 566 **ATP**

567 ATP levels were measured in two- and twenty-day-old fly heads with 40 flies per  
 568 genotype and three biological replicates. The ATP levels were measured as described  
 569 in Tufi, Gleeson *et al*. (Tufi *et al*, 2019) with minor modifications. Briefly, heads were  
 570 homogenized in 6 M guanidine-Tris/EDTA extraction buffer and subjected to rapid  
 571 freezing in liquid nitrogen. Luminescence produced from homogenates mixed with the  
 572 CellTiter-Glo Luminescent Cell Viability Assay (Promega) was measured with a  
 573 SpectraMax Gemini XPS luminometer (Molecular Devices) and normalized to total  
 574 protein, quantified using the Pierce BCA method (Thermo Fisher Scientific).  
 575

#### 576 **Quantification & Statistical analysis**

577 Statistical analyses were performed using GraphPad Prism 8 software. Data are  
 578 reported as mean  $\pm$  95 % CI unless otherwise stated in figure legends. Climbing was  
 579 assessed using a Kruskal-Wallis non-parametric test with Dunn's post-hoc correction  
 580 for multiple comparisons. Lifespans were compared using log-rank Mantel-Cox tests.  
 581 Number of flies and p-values are reported in the figure legends.  
 582

583 Mitochondrial transport was analysed using ordinary one-way ANOVA and Holm-  
 584 Sidak's multiple comparison. ATP measurements were analysed by two-tailed t-test.  
 585 Values are not significantly different to controls unless otherwise stated.  
 586

587 SCoPe (<http://scope.aertslab.org/>) was used to visualize transcriptome data from the  
 588 unfiltered adult fly brain dataset (Davie *et al*, 2018).  
 589

590 **Table S1: Fly Lines**

| Label         | Line                               | Source            | Reference                                                                                 | RRID                 |
|---------------|------------------------------------|-------------------|-------------------------------------------------------------------------------------------|----------------------|
| nSyb          | P{nSyb-GAL4.S}3 III                | BL51635           | Bloomington                                                                               | BDSC_51635           |
| OK371         | P{GawB}VGlut <sup>OK371</sup>      | BL26160           | (Mahr & Aberle, 2006)                                                                     | BDSC_26160           |
| da            | da-GAL4 III                        | Strutt Lab        | Bloomington                                                                               | BDSC_55850           |
| Act           | P{Act5C-GAL4}25FO1                 | BL4414            | Bloomington                                                                               | BDSC_4414            |
| CCAP          | P{CCAP-GAL4}16 (II)                | BL25685           | (Park <i>et al</i> , 2003)                                                                | BDSC_25685           |
| tether        | UAS-tether                         | Scorrano Lab      | (Basso <i>et al</i> , 2018) tether high (TH) construct from (Csordas <i>et al</i> , 2006) |                      |
| LacZ-RNAi     | P{GD936}v51446 II<br>UAS-LacZ-RNAi | VDRC (Strutt Lab) | (Dietzl <i>et al</i> , 2007)                                                              | FlyBase_FBst_0469426 |
| pdzd8-RNAi    | NIG 10362R-2<br>UAS-pdzd8-RNAi III | This study        | The fly stock was obtained from NIG-Fly Stock Center.                                     |                      |
| mitoGFP (II)  | P{UAS-mito-HA-GFP.AP}2             | BL8442            | (Pilling <i>et al</i> , 2006)                                                             | BDSC_8442            |
| mitoGFP (III) | P{UAS-mito-HA-GFP.AP}3, e1         | BL8443            | (Pilling <i>et al</i> , 2006)                                                             | BDSC_8443            |

|                  |                                          |                 |                                                                |            |
|------------------|------------------------------------------|-----------------|----------------------------------------------------------------|------------|
| mitoCherry       | P{UAS-mCherry.mito.OMM}(II I)            | Alessio Vagnoni | (Vagnoni <i>et al</i> , 2016)                                  | BDSC_66533 |
| ER-Tom           | PBac{20XUAS-tdTomato-Sec61β}VK00037 (II) | BL64746         | (Summerville <i>et al</i> , 2016)                              | BDSC_64746 |
| SPLICS           | SPLICSs#4                                | This study      | Construct from (Cieri <i>et al</i> , 2017)                     |            |
| mitoQC           | UAS-mitoQC (II)                          | Whitworth Lab   | (Lee <i>et al</i> , 2018b)                                     |            |
| Aβ               | P{UAS-Aβ.Arctic}                         | Isabel Palacios | (Crowther <i>et al</i> , 2005)<br>FBal0248069                  |            |
| <i>pdzd8</i> -HA | P{UAS- <i>pdzd8</i> -HA}(attP40)         | This study      | University of Cambridge<br>Department of Genetics Fly Facility |            |

591

592 **Table S2: Genotypes in figures**

|                 |                                                                                                              |
|-----------------|--------------------------------------------------------------------------------------------------------------|
| Figure 1 (B, C) | <i>LacZ</i> -RNAi/+; nSyb/+<br><i>pdzd8</i> -RNAi/nSyb                                                       |
| Figure 1 (D, E) | SPLICS/ <i>LacZ</i> -RNAi; nSyb/+<br>SPLICS/+; <i>pdzd8</i> -RNAi/nSyb                                       |
| Figure 1 (F, G) | ER-Tom, mitoGFP/ <i>LacZ</i> -RNAi; da/+<br>ER-tom, mitoGFP/+; da/ <i>pdzd8</i> -RNAi                        |
| Figure 2 (A, C) | <i>LacZ</i> -RNAi/+; nSyb/+<br><i>pdzd8</i> -RNAi/nSyb                                                       |
| Figure 2 (B, D) | <i>LacZ</i> -RNAi/+; nSyb/+<br>tether/nSyb                                                                   |
| Figure 3 (A-D)  | <i>LacZ</i> -RNAi/+; nSyb/+<br><i>pdzd8</i> -RNAi/nSyb                                                       |
| Figure 4 (A-E)  | CCAP/+; mitoGFP/+<br>CCAP/+; <i>pdzd8</i> -RNAi/mitoGFP<br>CCAP/+; tether/mitoGFP                            |
| Figure 4 (F-I)  | OK371, mitoGFP/ <i>LacZ</i> -RNAi<br>OK371, mitoGFP/+; <i>pdzd8</i> -RNAi/+                                  |
| Figure 5 (A-F)  | mitoQC/ <i>LacZ</i> -RNAi; nSyb/+<br>mitoQC/+; nSyb/ <i>pdzd8</i> -RNAi                                      |
| Figure 6 (A-B)  | <i>LacZ</i> -RNAi/SPLICS; nSyb/+<br>Aβ/SPLICS; nSyb/+                                                        |
| Figure 6 (C)    | <i>LacZ</i> -RNAi/+; nSyb/+<br><i>LacZ</i> -RNAi/Aβ; nSyb/+<br><i>LacZ</i> -RNAi/Aβ; <i>pdzd8</i> -RNAi/nSyb |
| Figure S1 (C)   | Act/ <i>LacZ</i> -RNAi (females)<br>Act/+; <i>pdzd8</i> -RNAi/+ (females)                                    |
| Figure S1 (D)   | ER-Tom, mitoGFP/ <i>LacZ</i> -RNAi, nSyb/+<br>ER-Tom, mitoGFP/+, nSyb/ <i>pdzd8</i> -RNAi                    |
| Figure S1 (E)   | ER-Tom, mitoGFP/ <i>LacZ</i> -RNAi; da/+<br>ER-tom, mitoGFP/+; da/ <i>pdzd8</i> -RNAi                        |
| Figure S2 (B)   | SPLICSs/+; nSyb-GAL4/+                                                                                       |
| Figure S2 (D)   | SPLICS/ <i>LacZ</i> -RNAi; nSyb/+<br>SPLICS/+; tether/nSyb                                                   |



|               |                                             |
|---------------|---------------------------------------------|
| Figure S3 (A) | OK371/ <i>LacZ</i> -RNAi                    |
|               | OK371/+; <i>pdzd8</i> -RNAi/+               |
| Figure S3 (B) | <i>LacZ</i> -RNAi/+; mitoCherry/nSyb,       |
|               | <i>LacZ</i> -RNAi/ <i>pdzd8</i> -HA; nSyb/+ |
|               | <i>pdzd8</i> -HA/+; <i>pdzd8</i> -RNAi/nSyb |
|               | tether/nSyb                                 |

593

## 594 Figure Legends

### 595 Figure 1.

596 **Expression of *pdzd8*-RNAi reduces mitochondria-ER contacts.** (A) Domain  
597 organisation of *Drosophila pdzd8* (CG10362) compared to mouse *Pdzd8* showing  
598 percentage identities of conserved domains based on Clustal Omega alignments.  
599 Overall percentage identity of the amino acid sequences is 21 %. SMP (Synaptotagmin-  
600 like mitochondrial lipid-binding proteins) 33 % identical, PDZ (PSD95/DLG/ZO-1) 36  
601 % identical, C1 (C1 protein kinase C conserved region 1 also known as Zn finger  
602 phorbol-ester/DAG-type signature) 47 % identical; TM: predicted transmembrane  
603 domain, CC: coil-coil domain. (B) Electron microscopy images of 2-day-old adult  
604 brains showing representative images of ER, mitochondria and MERCs in soma from  
605 nSyb>*LacZ*-RNAi and nSyb>*pdzd8*-RNAi flies. Scale bar 500 nm. Mitochondria  
606 without identifiable ER contacts marked with magenta \*, mitochondria forming ER  
607 contact marked with yellow \* with yellow arrow indicating contact location, organelles  
608 that did not contain clear cristae are marked with a cyan \* and were excluded from the  
609 analysis (C) Percentage of mitochondria in contact with the ER from controls and pan-  
610 neuronal nSyb>*pdzd8*-RNAi flies quantified from EM images of 2-day-old adult brains.  
611 N = 3 brains per genotype. (D) SPLICS puncta indicating MERCs in axon bundles of  
612 larval neurons from controls and nSyb>*pdzd8*-RNAi flies. Quantified puncta  
613 highlighted with V. (E) Quantification of SPLICS puncta in C. n = 11 animals per  
614 genotype, p=0.0198, unpaired t-test with Welch's Correction, scale bar 5  $\mu$ m. (F)  
615 Representative binarized SIM images of ER (green) and mitochondria (purple) in larval  
616 epidermal cells from controls and da>*pdzd8*-RNAi flies. Scale bar 500 nm. (G)  
617 Quantification of colocalization of ER and mitochondria using Mander's Correlations  
618 compared using an unpaired t-test with Welch's Correction. p=0.012.

619

### 620 Figure 2.

621 **Lifespan and locomotor activity changes in aged flies with pan-neuronal (nSyb)  
622 driven alterations in tethering.** (A, B) Locomotor activity of flies was assessed during  
623 aging by negative geotaxis climbing assays on the indicated days. n>50 flies per  
624 genotype. Flies expressing (A) *pdzd8*-RNAi or (B) synthetic tether were compared to  
625 *LacZ*-RNAi controls. (C, D) Lifespans in standard growth conditions and food. (C)  
626 Flies expressing *pdzd8*-RNAi were compared to *LacZ*-RNAi controls. n = 97, 108 per  
627 genotype, median survival 44 vs 52 days, p<0.0001. (D) Flies expressing the synthetic  
628 tether were compared to *LacZ*-RNAi controls. n = 74, 85 per genotype, median survival  
629 52 vs 33 days, p<0.0001.

630

### 631 Figure 3.

632 **Knockdown of *pdzd8* protects flies against mitochondrial toxins.** Flies expressing  
633 pan-neuronal nSyb>*pdzd8*-RNAi were compared to nSyb>*LacZ*-RNAi controls when  
634 aged on a restricted diet of food containing 1 % agar with 5 % sucrose. (A) Lifespan

635 with dietary restriction alone. N = 62 vs 64, median survival 20 days vs 19 days,  
636 difference ns. (B) Lifespan with addition of 5 % hydrogen peroxide. Median survival:  
637 63 h vs 74 h, n = 67, 74, p=0.0002. (C) Lifespan with addition of 1 mM rotenone.  
638 Median survival: 11 days vs 20 days, n = 66, 57, p<0.0001. (D) Lifespan with addition  
639 of 5 µg/mL antimycin A. Median survival: 74 h vs 68 h, n = 72, 68, p=0.0002.  
640

641 **Figure 4.**

642 **Knockdown of *pdzd8* in larval neurons causes minor defects while increasing**  
643 **MERCs is detrimental to in axonal mitochondria size and motility.** (A)

644 Representative images of mitochondrial morphology and distribution in larval axons.  
645 Mitochondria were detected using CCAP>mitoGFP in controls and *pdzd8*-RNAi  
646 expressing larvae. Scale bar 5 µm. (B,C) Mitochondrial length (B), and mitochondrial  
647 density (C) in the larval axons shown in A were analysed using ordinary one-way  
648 ANOVA and Holm-Sidak's multiple comparisons. n = 10, 10, 13 animals, data points  
649 represent different axons, all differences ns. (D) Representative kymographs showing  
650 motility of CCAP>mitoGFP signal in controls and *pdzd8*-RNAi expressing larvae.  
651 Stationary mitochondria appear as vertical lines, moving mitochondria form diagonal  
652 lines in anterograde or retrograde directions, t = 500s (E) Quantification of  
653 mitochondrial transport shown in D, analysed using ordinary one-way ANOVA and  
654 Holm-Sidak's multiple comparisons, n = 14-25, p<0.0001. (F) Representative images  
655 of NMJs and mitochondria of controls and *pdzd8*-RNAi labelled using  
656 OK371>mitoGFP. magenta = mitoGFP, green = anti-HRP (neuronal membrane), scale  
657 bar 10 µm. (G-I) Quantifications of NMJ volume, p=0.0036, (G), mitochondrial  
658 volume, p=0.002 (H) and mitochondrial density (I) were compared using an unpaired  
659 t-test with Welch's Correction.  
660

661 **Figure 5.**

662 **Pan-neuronal *pdzd8*-RNAi increases mitophagy during aging.** (A) Representative  
663 images of MitoQC signal in wandering L3 larval ventral ganglia. magenta = mCherry,  
664 green = GFP, images show a single plane of a Z-stack, scale bar 2 µm. (B)  
665 Quantification of MitoQC puncta shown in (A), n = 9, differences ns. (C)  
666 Representative images of MitoQC signal in adult brains in two- and ten-day old flies,  
667 magenta = mCherry, green = GFP, scale bar 5 µm, image shows a single plane of a Z-  
668 stack. (D) Quantification of MitoQC signal in adult brains and compared using an  
669 unpaired t-test with Welch's correction (n = 7-9, p=0.0072) (E) the Representative  
670 images of MitoQC signal in 14 day-old fly wings. Only mCherry signal (magenta) is  
671 shown for clarity, white outlines edges of wing nerves, scale bar 5 µm. (F)  
672 Quantification of MitoQC signal in aged fly wings at 2, 14 and 30 days post eclosion  
673 using a one-way ANOVA with Holm-Sidak's multiple comparisons. n (2 days) = 33,  
674 26 (14 days) = 24, 31, (30 days) = 32, 12.  
675

676 **Figure 6.**

677 **Reducing *pdzd8*-mediated MERCs rescues the locomotor defects in an**  
678 **Alzheimer's disease *Drosophila* model.** (A) CCAP>SPLICS signal in larval axons  
679 expressing Aβ<sub>42</sub> compared to controls. Quantified puncta highlighted with V. (B)  
680 Quantification of SPLICS signal in (A) using an unpaired t-test with Welch's  
681 correction, n = 6, p=0.008. (C) Aged climbing assay of flies expressing nSyb>Aβ<sub>42</sub>,  
682 n>75 flies were aged and climbed on the indicated days. p <0.001, 0.002, <0.001,  
683 <0.001.

684

685 **Figure S1.**

686 **Expression and tissue specificity of *pdzd8*.** (A) Tissue specific expression of *pdzd8*  
687 in 7 day old adult males from (Leader *et al*, 2018) FPKM: fragments per kilobase of  
688 exon model per million reads mapped providing a normalized estimation of gene  
689 expression based on RNA-seq data. (B) SCoPe transcriptome data from the unfiltered  
690 adult fly brain dataset. (C) Relative abundance of *pdzd8* transcript in controls compared  
691 to Tub>*pdzd8*-RNAi normalised to the relative to geometric mean of housekeeping  
692 genes *αTub84B*, *vkg*, *COX8* and *Rpl32*;  $p=0.0134$ . (D) Representative SIM images of  
693 ER (green) and mitochondria (purple) in L3 larval neurons, scale bar 5  $\mu\text{m}$ . (E)  
694 Representative SIM images of ER and mitochondria in larval epidermal cells, scale bar  
695 5  $\mu\text{m}$ . (F) Close up inlays (F'-F''') of example MERCs in Figure 1E identified in  
696 nSyb>*LacZ*-RNAi brains imaged using electron microscopy. Scale bar 500 nm.

697

698 **Figure S2.**

699 **SPLICS and tether constructs used in this study.** (A) Cartoon of SPLICS targeting  
700 and mode of action (Created with BioRender.com). (B) Density of SPLICS puncta in  
701 axons is different in different axon bundles, scale bar 5  $\mu\text{m}$ . (C) Cartoon of the synthetic  
702 tether construct targeting and mode of action (Created with BioRender.com). (D)  
703 nSyb>SPLICS puncta indicating contact sites in larval axons, scale bar 5  $\mu\text{m}$ ,  $n = 9$  per  
704 genotype.

705

706 **Figure S3.**

707 **Phenotypic characterization of altered tethering in motor neurons.** (A) Motor  
708 neuron-specific aged climbing assay showing OK371>*pdzd8*-RNAi compared to *LacZ*-  
709 RNAi controls. (B) *pdzd8*-RNAi rescues aged climbing defect resulting from *pdzd8*  
710 over expression. (C) nSyb>tether expression resulted in severely deformed NMJs on  
711 muscle 4 and made it impossible to distinguish NMJs type 1s and 1b synaptic boutons  
712 (therefore mitochondrial density could not be quantified). (D) ATP levels in fly heads  
713 analysed showing mean  $\pm$  standard deviation,  $n = 3$ , 40 flies per replicate, compared  
714 using a two-tailed t-test, all differences ns.

715 **Acknowledgements**

716 We thank Vinay Godena, Caspar Baldwin, Alvaro Sanchez-Martinez, Tom Gleeson,  
717 Juliette Lee and Wing-Hei Au for help with various aspects of the fly work. Ana  
718 Terriente-Felix for help with stock maintenance and generating lines. Luis Gracia for  
719 developing the lifespan data analysis tool (<https://flies.shinyapps.io/Rflies/>). David Pate  
720 and Steve Drinkwater all their help setting up our fly lab. Carlo Viscomi and Hiran Prag  
721 for useful critical discussion. Richard Mann and Sumaira Zamurrad for the help with  
722 completing the fly work. Cristiane Benincà, Jordan Morris and the Wohl Cellular  
723 Imaging Centre at King's College London for their help with microscopy. Karin H.  
724 Muller, Lyn Carter and Filomena Gallo for their help with TEM at the Cambridge  
725 Advanced Imaging Center (CAIC), and Jane Stinchcombe and Sam Loh for help  
726 interpreting this data. We thank Megan Oliva and Erin Barnhart and her lab for their  
727 critical reading of the manuscript. We thank Isabel Palacios for the A $\beta$ -Arctic flies and  
728 Luca Scorrano and Valentina Debattisti for the synthetic tether line. Other stocks were  
729 obtained from the Bloomington Drosophila Stock Center which is supported by grant  
730 NIH P40OD018537.

731

732 **Conflict of Interests**

733 The authors declare that they have no conflict of interest.

734

735 **Funding**

736 This work was supported by MRC core funding (MC\_UU\_00015/6) and ERC Starting  
737 grant (DYNAMITO; 309742) to AJW; a NC3Rs David Sainsbury fellowship and SKT  
738 grant (N/N001753/2 and NC/T001224/1), an Academy of Medical Sciences  
739 Springboard Award (SBF004/1088) and a van Geest Fellowship in Dementia and  
740 Neurodegeneration and van Geest PhD studentship awards to AV. VLH was funded by  
741 an EMBO Long-Term Fellowship (ALTF 740-2015) co-funded by the European  
742 Commission FP7 (Marie Curie Actions, LTFCONFUND2013, GA-2013-609409).  
743 Stocks were obtained from the Bloomington Drosophila Stock Center which is  
744 supported by grant NIH P40OD018537.

745

746 **Author Contributions**

747 VLH, LM-F, SA, JP, FM and AV designed and/or performed experiments, and  
748 analysed the data. VLH wrote the manuscript with input from all authors. AJW, AV  
749 and FP supervised the work.

750 **References**

- 751 Allen GFG, Toth R, James J, Ganley IG (2013) Loss of iron triggers  
752 PINK1/Parkin-independent mitophagy. *EMBO Reports* 14: 1127-1135
- 753 Andrezza S, Samstag CL, Sanchez-Martinez A, Fernandez-Vizarra E, Gomez-  
754 Duran A, Lee JJ, . . . Whitworth AJ (2019) Mitochondrially-targeted APOBEC1 is  
755 a potent mtDNA mutator affecting mitochondrial function and organismal fitness  
756 in *Drosophila*. *Nat Commun* 10: 3280
- 757 Aparicio R, Rana A, Walker DW (2019) Upregulation of the Autophagy Adaptor  
758 p62/SQSTM1 Prolongs Health and Lifespan in Middle-Aged *Drosophila*. *Cell*  
759 *Rep* 28: 1029-1040 e1025
- 760 Area-Gomez E, del Carmen Lara Castillo M, Tambini MD, Guardia-Laguarta C,  
761 de Groof AJC, Madra M, . . . Schon EA (2012) Upregulated function of  
762 mitochondria-associated ER membranes in Alzheimer disease. *EMBO J* 31: 4106-  
763 4123
- 764 Ashrafi G, Schlehe JS, LaVoie MJ, Schwarz TL (2014) Mitophagy of damaged  
765 mitochondria occurs locally in distal neuronal axons and requires PINK1 and  
766 Parkin. *J Cell Biol* 206: 655-670
- 767 Baldwin KR, Godena VK, Hewitt VL, Whitworth AJ (2016) Axonal transport  
768 defects are a common phenotype in *Drosophila* models of ALS. *Hum Mol Genet*  
769 25: 2378-2392
- 770 Basso V, Marchesan E, Peggion C, Chakraborty J, von Stockum S, Giacomello  
771 M, . . . Ziviani E (2018) Regulation of Endoplasmic Reticulum-Mitochondria  
772 contacts by Parkin via Mfn2. *Pharmacological Research* 138: 43-56

- 773 Brand AH, Perrimon N (1993) Targeted gene expression as a means of altering  
774 cell fates and generating dominant phenotypes. *Development* 118: 401-415
- 775 Cao X, Wang H, Wang Z, Wang Q, Zhang S, Deng Y, Fang Y (2017) *In vivo*  
776 imaging reveals mitophagy independence in the maintenance of axonal  
777 mitochondria during normal aging. *Aging Cell* 16: 1180-1190
- 778 Celardo I, Costa AC, Lehmann S, Jones C, Wood N, Mencacci NE, . . . Martins  
779 LM (2016) Mitofusin-mediated ER stress triggers neurodegeneration in  
780 pink1/parkin models of Parkinson's disease. *Cell Death Dis* 7: e2271
- 781 Cieri D, Vicario M, Giacomello M, Vallese F, Filadi R, Wagner T, . . . Cali T  
782 (2017) SPLICS: a split green fluorescent protein-based contact site sensor for  
783 narrow and wide heterotypic organelle juxtaposition. *Cell Death Differ* 25: 1131-  
784 1145
- 785 Cornelissen T, Vilain S, Vints K, Goukko N, Verstreken P, Vandenberghe W  
786 (2018) Deficiency of parkin and PINK1 impairs age-dependent mitophagy in  
787 *Drosophila*. *Elife* 7: e35878
- 788 Crowther DC, Kinghorn KJ, Miranda E, Page R, Curry JA, Duthie FA, . . . Lomas  
789 DA (2005) Intraneuronal A $\beta$ , non-amyloid aggregates and neurodegeneration in a  
790 *Drosophila* model of Alzheimer's disease. *Neuroscience* 132: 123-135
- 791 Csordas G, Renken C, Varnai P, Walter L, Weaver D, Buttle KF, . . . Hajnoczky  
792 G (2006) Structural and functional features and significance of the physical  
793 linkage between ER and mitochondria. *J Cell Biol* 174: 915-921
- 794 Csordas G, Weaver D, Hajnoczky G (2018) Endoplasmic Reticular-Mitochondrial  
795 Contactology: Structure and Signaling Functions. *Trends Cell Biol* 28: 523-540
- 796 Davie K, Janssens J, Koldere D, De Waegeneer M, Pech U, Kreft L, . . . Aerts S  
797 (2018) A Single-Cell Transcriptome Atlas of the Aging *Drosophila* Brain. *Cell*  
798 174: 982-998.e920
- 799 De Vos KJ, Grierson AJ, Ackerley S, Miller CC (2008) Role of axonal transport  
800 in neurodegenerative diseases. *Annu Rev Neurosci* 31: 151-173
- 801 De Vos KJ, Hafezparast M (2017) Neurobiology of axonal transport defects in  
802 motor neuron diseases: Opportunities for translational research? *Neurobiol Dis*  
803 105: 283-299
- 804 Debattisti V, Pendin D, Ziviani E, Daga A, Scorrano L (2014) Reduction of  
805 endoplasmic reticulum stress attenuates the defects caused by *Drosophila*  
806 mitofusin depletion. *J Cell Biol* 204: 303-312
- 807 Del Prete D, Suski JM, Oules B, Debayle D, Gay AS, Lacas-Gervais S, . . . Chami  
808 M (2017) Localization and Processing of the Amyloid- $\beta$  Protein Precursor in  
809 Mitochondria-Associated Membranes. *J Alzheimers Dis* 55: 1549-1570



- 810 Dietzl G, Chen D, Schnorrer F, Su KC, Barinova Y, Fellner M, . . . Dickson BJ  
811 (2007) A genome-wide transgenic RNAi library for conditional gene inactivation  
812 in *Drosophila*. *Nature* 448: 151-156
- 813 Edelstein AD, Tsuchida MA, Amodaj N, Pinkard H, Vale RD, Stuurman N (2014)  
814 Advanced methods of microscope control using µManager software. *J Biol*  
815 *Methods* 1: e10
- 816 El Fissi N, Rojo M, Aouane A, Karatas E, Poliacikova G, David C, . . . Rival T  
817 (2018) Mitofusin gain and loss of function drive pathogenesis in *Drosophila*  
818 models of CMT2A neuropathy. *EMBO Rep* 19: e45241
- 819 Elbaz-Alon Y, Guo Y, Segev N, Harel M, Quinnell DE, Geiger T, . . . Nunnari J  
820 (2020) PDZD8 interacts with Protrudin and Rab7 at ER-late endosome membrane  
821 contact sites associated with mitochondria. *Nat Commun* 11: 3645
- 822 Erpapazoglou Z, Mouton-Liger F, Corti O (2017) From dysfunctional  
823 endoplasmic reticulum-mitochondria coupling to neurodegeneration.  
824 *Neurochemistry International* 109: 171-183
- 825 Evans CS, Holzbaur EL (2020) Degradation of engulfed mitochondria is rate-  
826 limiting in Optineurin-mediated mitophagy in neurons. *Elife* 9: e50260
- 827 Evans CS, Holzbaur ELF (2019) Quality Control in Neurons: Mitophagy and  
828 Other Selective Autophagy Mechanisms. *Journal of Molecular Biology* 432: 240-  
829 260
- 830 Fang EF, Hou Y, Palikaras K, Adriaanse BA, Kerr JS, Yang B, . . . Bohr VA  
831 (2019) Mitophagy inhibits amyloid-beta and tau pathology and reverses cognitive  
832 deficits in models of Alzheimer's disease. *Nat Neurosci* 22: 401-412
- 833 Giacomello M, Pellegrini L (2016) The coming of age of the mitochondria-ER  
834 contact: a matter of thickness. *Cell Death Differ* 23: 1417-1427
- 835 Godena VK, Brookes-Hocking N, Moller A, Shaw G, Oswald M, Sancho RM, . . .  
836 De Vos KJ (2014) Increasing microtubule acetylation rescues axonal transport and  
837 locomotor deficits caused by LRRK2 Roc-COR domain mutations. *Nat Commun*  
838 5: 1-11
- 839 Gomes LC, Di Benedetto G, Scorrano L (2011) During autophagy mitochondria  
840 elongate, are spared from degradation and sustain cell viability. *Nat Cell Biol* 13:  
841 589-598
- 842 Gómez-Suaga P, Pérez-Nievas BG, Glennon EB, Lau DHW, Paillusson S, Mórutz  
843 GM, . . . Miller CCJ (2019) The VAPB-PTPIP51 endoplasmic reticulum-  
844 mitochondria tethering proteins are present in neuronal synapses and regulate  
845 synaptic activity. *Acta neuropathologica communications* 7: 35-35
- 846 Greene JC, Whitworth AJ, Kuo I, Andrews LA, Feany MB, Pallanck LJ (2003)  
847 Mitochondrial pathology and apoptotic muscle degeneration in *Drosophila* parkin  
848 mutants. *Proceedings of the National Academy of Sciences of the United States of*  
849 *America* 100: 4078-4083

- 850 Guillen-Samander A, Bian X, De Camilli P (2019) PDZD8 mediates a Rab7-  
851 dependent interaction of the ER with late endosomes and lysosomes. *Proc Natl*  
852 *Acad Sci U S A* 116: 22619-22623
- 853 Hailey DW, Rambold AS, Satpute-Krishnan P, Mitra K, Sougrat R, Kim PK,  
854 Lippincott-Schwartz J (2010) Mitochondria supply membranes for  
855 autophagosome biogenesis during starvation. *Cell* 141: 656-667
- 856 Hamasaki M, Furuta N, Matsuda A, Nezu A, Yamamoto A, Fujita N, . . .  
857 Yoshimori T (2013) Autophagosomes form at ER-mitochondria contact sites.  
858 *Nature* 495: 389-393
- 859 Harbauer AB (2017) Mitochondrial health maintenance in axons. *Biochem Soc*  
860 *Trans*
- 861 Hirabayashi Y, Kwon SK, Paek H, Pernice WM, Paul MA, Lee J, . . . Polleux F  
862 (2017) ER-mitochondria tethering by PDZD8 regulates Ca<sup>2+</sup> dynamics in  
863 mammalian neurons. *Science* 358: 623-630
- 864 Hwa JJ, Hiller MA, Fuller MT, Santel A (2002) Differential expression of the  
865 *Drosophila* mitofusin genes *fuzzy onions* (*fzo*) and *dmf1*. *Mechanisms of*  
866 *Development* 116: 213-216
- 867 Jeong H, Park J, Jun Y, Lee C (2017) Crystal structures of Mmm1 and Mdm12-  
868 Mmm1 reveal mechanistic insight into phospholipid trafficking at ER-  
869 mitochondria contact sites. *Proc Natl Acad Sci U S A*
- 870 Kawano S, Tamura Y, Kojima R, Bala S, Asai E, Michel AH, . . . Endo T (2018)  
871 Structure-function insights into direct lipid transfer between membranes by  
872 Mmm1-Mdm12 of ERMES. *J Cell Biol* 217: 959-974
- 873 Kerr JS, Adriaanse BA, Greig NH, Mattson MP, Cader MZ, Bohr VA, Fang EF  
874 (2017) Mitophagy and Alzheimer's Disease: Cellular and Molecular Mechanisms.  
875 *Trends Neurosci* 40: 151-166
- 876 Kornmann B, Currie E, Collins SR, Schuldiner M, Nunnari J, Weissman JS,  
877 Walter P (2009) An ER-Mitochondria Tethering Complex Revealed by a  
878 Synthetic Biology Screen. *Science* 325: 477-481
- 879 Krols M, Asselbergh B, De Rycke R, De Winter V, Seyer A, Muller FJ, . . .  
880 Janssens S (2018) Sensory neuropathy-causing mutations in ATL3 affect ER-  
881 mitochondria contact sites and impair axonal mitochondrial distribution. *Hum Mol*  
882 *Genet* 28: 615-627
- 883 Leader DP, Krause SA, Pandit A, Davies SA, Dow JAT (2018) FlyAtlas 2: a new  
884 version of the *Drosophila melanogaster* expression atlas with RNA-Seq, miRNA-  
885 Seq and sex-specific data. *Nucleic Acids Res* 46: D809-D815
- 886 Lee A, Hirabayashi Y, Kwon SK, Lewis TL, Jr., Polleux F (2018a) Emerging  
887 roles of mitochondria in synaptic transmission and neurodegeneration. *Curr Opin*  
888 *Physiol* 3: 82-93

- 889 Lee A, Kondapalli C, Virga DM, Lewis TL, Koo SY, Ashok A, . . . Polleux F  
890 (2019) A $\beta$ 42 oligomers trigger synaptic loss through CAMKK2-AMPK-  
891 dependent effectors coordinating mitochondrial fission and mitophagy. *bioRxiv*:  
892 637199
- 893 Lee I, Hong W (2006) Diverse membrane-associated proteins contain a novel  
894 SMP domain. *FASEB J* 20: 202-206
- 895 Lee JJ, Sanchez-Martinez A, Zarate AM, Beninca C, Mayor U, Clague MJ,  
896 Whitworth AJ (2018b) Basal mitophagy is widespread in *Drosophila* but  
897 minimally affected by loss of Pink1 or parkin. *J Cell Biol* 217: 1613-1622
- 898 Lee KS, Huh S, Lee S, Wu Z, Kim AK, Kang HY, Lu B (2018c) Altered ER-  
899 mitochondria contact impacts mitochondria calcium homeostasis and contributes  
900 to neurodegeneration in vivo in disease models. *Proc Natl Acad Sci U S A* 115:  
901 E8844-E8853
- 902 Lopez-Otin C, Blasco MA, Partridge L, Serrano M, Kroemer G (2013) The  
903 hallmarks of aging. *Cell* 153: 1194-1217
- 904 Ma P, Yun J, Deng H, Guo M (2018) Atg1 mediated autophagy suppresses tissue  
905 degeneration in *pink1/parkin* mutants by promoting mitochondrial fission in  
906 *Drosophila*. *Mol Biol Cell* 29: 3082-2092
- 907 Maday S, Twelvetrees AE, Moughamian AJ, Holzbaur EL (2014) Axonal  
908 transport: cargo-specific mechanisms of motility and regulation. *Neuron* 84: 292-  
909 309
- 910 Mahr A, Aberle H (2006) The expression pattern of the *Drosophila* vesicular  
911 glutamate transporter: a marker protein for motoneurons and glutamatergic centers  
912 in the brain. *Gene Expr Patterns* 6: 299-309
- 913 Martino Adami PV, Nichtova Z, Weaver DB, Bartok A, Wisniewski T, Jones DR,  
914 . . . Morelli L (2019) Perturbed mitochondria-ER contacts in live neurons that  
915 model the amyloid pathology of Alzheimer's disease. *J Cell Sci* 132
- 916 Mattedi F, Vagnoni A (2019) Temporal Control of Axonal Transport: The  
917 Extreme Case of Organismal Ageing. *Front Cell Neurosci* 13: 393
- 918 McLelland GL, Fon EA (2018) MFN2 retrotranslocation boosts mitophagy by  
919 uncoupling mitochondria from the ER. *Autophagy* 14: 1658-1660
- 920 McLelland GL, Goiran T, Yi W, Dorval G, Chen CX, Lauinger ND, . . . Fon EA  
921 (2018) Mfn2 ubiquitination by PINK1/parkin gates the p97-dependent release of  
922 ER from mitochondria to drive mitophagy. *Elife* 7: e32866
- 923 McWilliams TG, Prescott AR, Montava-Garriga L, Ball G, Singh F, Barini E, . . .  
924 Ganley IG (2018) Basal Mitophagy Occurs Independently of PINK1 in Mouse  
925 Tissues of High Metabolic Demand. *Cell Metab* 27: 439-449.e435

- 926 McWilliams TG, Prescott AR, Villarejo-Zori B, Ball G, Boya P, Ganley IG  
927 (2019) A comparative map of macroautophagy and mitophagy in the vertebrate  
928 eye. *Autophagy* 15: 1296-1308
- 929 Misgeld T, Schwarz TL (2017) Mitostasis in Neurons: Maintaining Mitochondria  
930 in an Extended Cellular Architecture. *Neuron* 96: 651-666
- 931 Montava-Garriga L, Ganley IG (2020) Outstanding Questions in Mitophagy:  
932 What We Do and Do Not Know. *Journal of Molecular Biology* 432: 206-230
- 933 Morotz GM, Glennon EB, Greig J, Lau DHW, Bhembre N, Mattedi F, . . . Miller  
934 CCJ (2019) Kinesin light chain-1 serine-460 phosphorylation is altered in  
935 Alzheimer's disease and regulates axonal transport and processing of the amyloid  
936 precursor protein. *Acta Neuropathol Commun* 7: 200
- 937 Nijhof B, Castells-Nobau A, Wolf L, Scheffer-de Gooyert JM, Monedero I,  
938 Torroja L, . . . Schenck A (2016) A New Fiji-Based Algorithm That  
939 Systematically Quantifies Nine Synaptic Parameters Provides Insights into  
940 *Drosophila* NMJ Morphometry. *PLoS Computational Biology* 12: e1004823
- 941 Paillusson S, Stoica R, Gomez-Suaga P, Lau DHW, Mueller S, Miller T, Miller  
942 CCJ (2016) There's Something Wrong with my MAM; the ER; Mitochondria  
943 Axis and Neurodegenerative Diseases. *Trends in Neurosciences* 39: 146-157
- 944 Palikaras K, Lionaki E, Tavernarakis N (2015) Coordination of mitophagy and  
945 mitochondrial biogenesis during ageing in *C. elegans*. *Nature* 521: 525-528
- 946 Park JH, Schroeder AJ, Helfrich-Forster C, Jackson FR, Ewer J (2003) Targeted  
947 ablation of CCAP neuropeptide-containing neurons of *Drosophila* causes specific  
948 defects in execution and circadian timing of ecdysis behavior. *Development* 130:  
949 2645-2656
- 950 Pickrell AM, Youle RJ (2015) The roles of PINK1, parkin, and mitochondrial  
951 fidelity in Parkinson's disease. *Neuron* 85: 257-273
- 952 Pilling AD, Horiuchi D, Lively CM, Saxton WM (2006) Kinesin-1 and Dynein  
953 are the primary motors for fast transport of mitochondria in *Drosophila* motor  
954 axons. *Molecular Biology of the Cell* 17: 2057-2068
- 955 Puri R, Cheng XT, Lin MY, Huang N, Sheng ZH (2019) Muf1 restrains Parkin-  
956 mediated mitophagy in mature neurons by maintaining ER-mitochondrial  
957 contacts. *Nat Commun* 10: 3645
- 958 Rambold AS, Kostecky B, Elia N, Lippincott-Schwartz J (2011) Tubular  
959 network formation protects mitochondria from autophagosomal degradation  
960 during nutrient starvation. *Proc Natl Acad Sci U S A* 108: 10190-10195
- 961 Rana A, Oliveira MP, Khamoui AV, Aparicio R, Rera M, Rossiter HB, Walker  
962 DW (2017) Promoting Drp1-mediated mitochondrial fission in midlife prolongs  
963 healthy lifespan of *Drosophila melanogaster*. *Nat Commun* 8: 448

- 964 Rival T, Page RM, Chandraratna DS, Sendall TJ, Ryder E, Liu B, . . . Lomas DA  
965 (2009) Fenton chemistry and oxidative stress mediate the toxicity of the  $\beta$ -  
966 amyloid peptide in a *Drosophila* model of Alzheimer's disease. *Eur J Neurosci*  
967 29: 1335-1347
- 968 Rowland AA, Voeltz GK (2012) Endoplasmic reticulum-mitochondria contacts:  
969 function of the junction. *Nat Rev Mol Cell Biol* 13: 607-625
- 970 Sandoval H, Yao C-K, Chen K, Jaiswal M, Donti T, Lin YQ, . . . Bellen HJ  
971 (2014) Mitochondrial fusion but not fission regulates larval growth and synaptic  
972 development through steroid hormone production. *Elife* 3: e03558
- 973 Sayers EW, Cavanaugh M, Clark K, Ostell J, Pruitt KD, Karsch-Mizrachi I (2020)  
974 GenBank. *Nucleic Acids Res* 48: D84-D86
- 975 Schindelin J, Arganda-Carreras I, Frise E, Kaynig V, Longair M, Pietzsch T, . . .  
976 Cardona A (2012) Fiji: an open-source platform for biological-image analysis. *Nat*  
977 *Methods* 9: 676-682
- 978 Sepulveda-Falla D, Barrera-Ocampo A, Hagel C, Korwitz A, Vinueza-Veloz MF,  
979 Zhou K, . . . Glatzel M (2014) Familial Alzheimer's disease-associated presenilin-  
980 1 alters cerebellar activity and calcium homeostasis. *J Clin Invest* 124: 1552-1567
- 981 Shirane M, Wada M, Morita K, Hayashi N, Kunimatsu R, Matsumoto Y, . . .  
982 Nakayama KI (2020) Protrudin and PDZD8 contribute to neuronal integrity by  
983 promoting lipid extraction required for endosome maturation. *Nat Commun* 11:  
984 4576
- 985 Stavoe AKH, Holzbaur ELF (2019) Autophagy in Neurons. *Annual Review of*  
986 *Cell and Developmental Biology* 35: 477-500
- 987 Summerville J, Faust J, Fan E, Pendin D, Daga A, Formella J, . . . McNew JA  
988 (2016) The effects of ER morphology on synaptic structure and function in  
989 *Drosophila melanogaster*. *J Cell Sci* 129: 1635-1648
- 990 Sun N, Yun J, Liu J, Malide D, Liu C, Rovira, II, . . . Finkel T (2015) Measuring  
991 In Vivo Mitophagy. *Mol Cell* 60: 685-696
- 992 Taylor SC, Nadeau K, Abbasi M, Lachance C, Nguyen M, Fenrich J (2019) The  
993 Ultimate qPCR Experiment: Producing Publication Quality, Reproducible Data  
994 the First Time. *Trends in Biotechnology* 37: 761-774
- 995 Tenenbaum CM, Gavis ER (2016) Removal of *Drosophila* Muscle Tissue from  
996 Larval Fillets for Immunofluorescence Analysis of Sensory Neurons and  
997 Epidermal Cells. *J Vis Exp*: 54670
- 998 Tufi R, Gleeson TP, von Stockum S, Hewitt VL, Lee JJ, Terriente-Felix A, . . .  
999 Whitworth AJ (2019) Comprehensive Genetic Characterization of Mitochondrial  
1000  $\text{Ca}^{2+}$  Uniporter Components Reveals Their Different Physiological Requirements  
1001 *In Vivo*. *Cell Rep* 27: 1541-1550 e1545



- 1002 Twig G, Elorza A, Molina AJ, Mohamed H, Wikstrom JD, Walzer G, . . . Shirihai  
1003 OS (2008) Fission and selective fusion govern mitochondrial segregation and  
1004 elimination by autophagy. *EMBO J* 27: 433-446
- 1005 Vagnoni A, Bullock SL (2016) A simple method for imaging axonal transport in  
1006 aging neurons using the adult *Drosophila* wing. *Nat Protoc* 11: 1711-1723
- 1007 Vagnoni A, Bullock SL (2018) A cAMP/PKA/Kinesin-1 Axis Promotes the  
1008 Axonal Transport of Mitochondria in Aging *Drosophila* Neurons. *Curr Biol* 28:  
1009 1265-1272.e1264
- 1010 Vagnoni A, Hoffmann PC, Bullock SL (2016) Reducing Lissencephaly-1 levels  
1011 augments mitochondrial transport and has a protective effect in adult *Drosophila*  
1012 neurons. *J Cell Sci* 128: 178-190
- 1013 Valadas JS, Esposito G, Vandekerkhove D, Miskiewicz K, Deaulmerie L, Raitano  
1014 S, . . . Verstreken P (2018) ER Lipid Defects in Neuropeptidergic Neurons Impair  
1015 Sleep Patterns in Parkinson's Disease. *Neuron* 98: 1155-1169.e1156
- 1016 Wang X, Schwarz TL (2009) Imaging axonal transport of mitochondria. In:  
1017 *Methods Enzymol*, pp. 319-333.
- 1018 Whitworth AJ, Pallanck L (2017) PINK1/Parkin mitophagy and  
1019 neurodegeneration – what do we really know *in vivo*? *Current Opinion in*  
1020 *Genetics and Development* 44: 47-53
- 1021 Wideman JG, Balacco DL, Fieblinger T, Richards TA (2018) PDZD8 is not the  
1022 ‘functional ortholog’ of Mmm1, it is a paralog. *F1000Research* 7: 1088
- 1023 Wong LH, Levine TP (2017) Tubular lipid binding proteins (TULIPs) growing  
1024 everywhere. *Biochim Biophys Acta* 1864: 1439-1449
- 1025 Wong YC, Peng W, Krainc D (2019) Lysosomal Regulation of Inter-  
1026 mitochondrial Contact Fate and Motility in Charcot-Marie-Tooth Type 2. *Dev*  
1027 *Cell* 50: 339-354.e334
- 1028 Wu Y, Whiteus C, Xu CS, Hayworth KJ, Weinberg RJ, Hess HF, De Camilli P  
1029 (2017) Contacts between the endoplasmic reticulum and other membranes in  
1030 neurons. *Proc Natl Acad Sci U S A* 114: E4859-E4867
- 1031 Yang JY, Yang WY (2013) Bit-by-bit autophagic removal of parkin-labelled  
1032 mitochondria. *Nat Commun* 4: 2428
- 1033 Zampese E, Fasolato C, Kipanyula MJ, Bortolozzi M, Pozzan T, Pizzo P (2011)  
1034 Presenilin 2 modulates endoplasmic reticulum (ER)-mitochondria interactions and  
1035 Ca<sup>2+</sup> cross-talk. *Proc Natl Acad Sci U S A* 108: 2777-2782
- 1036 Zheng Y, Zhang X, Wu X, Jiang L, Ahsan A, Ma S, . . . Chen Z (2019) Somatic  
1037 autophagy of axonal mitochondria in ischemic neurons. *J Cell Biol* 218: 1891-  
1038 1907  
1039

# Figure 1. Expression of *pdzd8*-RNAi reduces mitochondria-ER contacts.

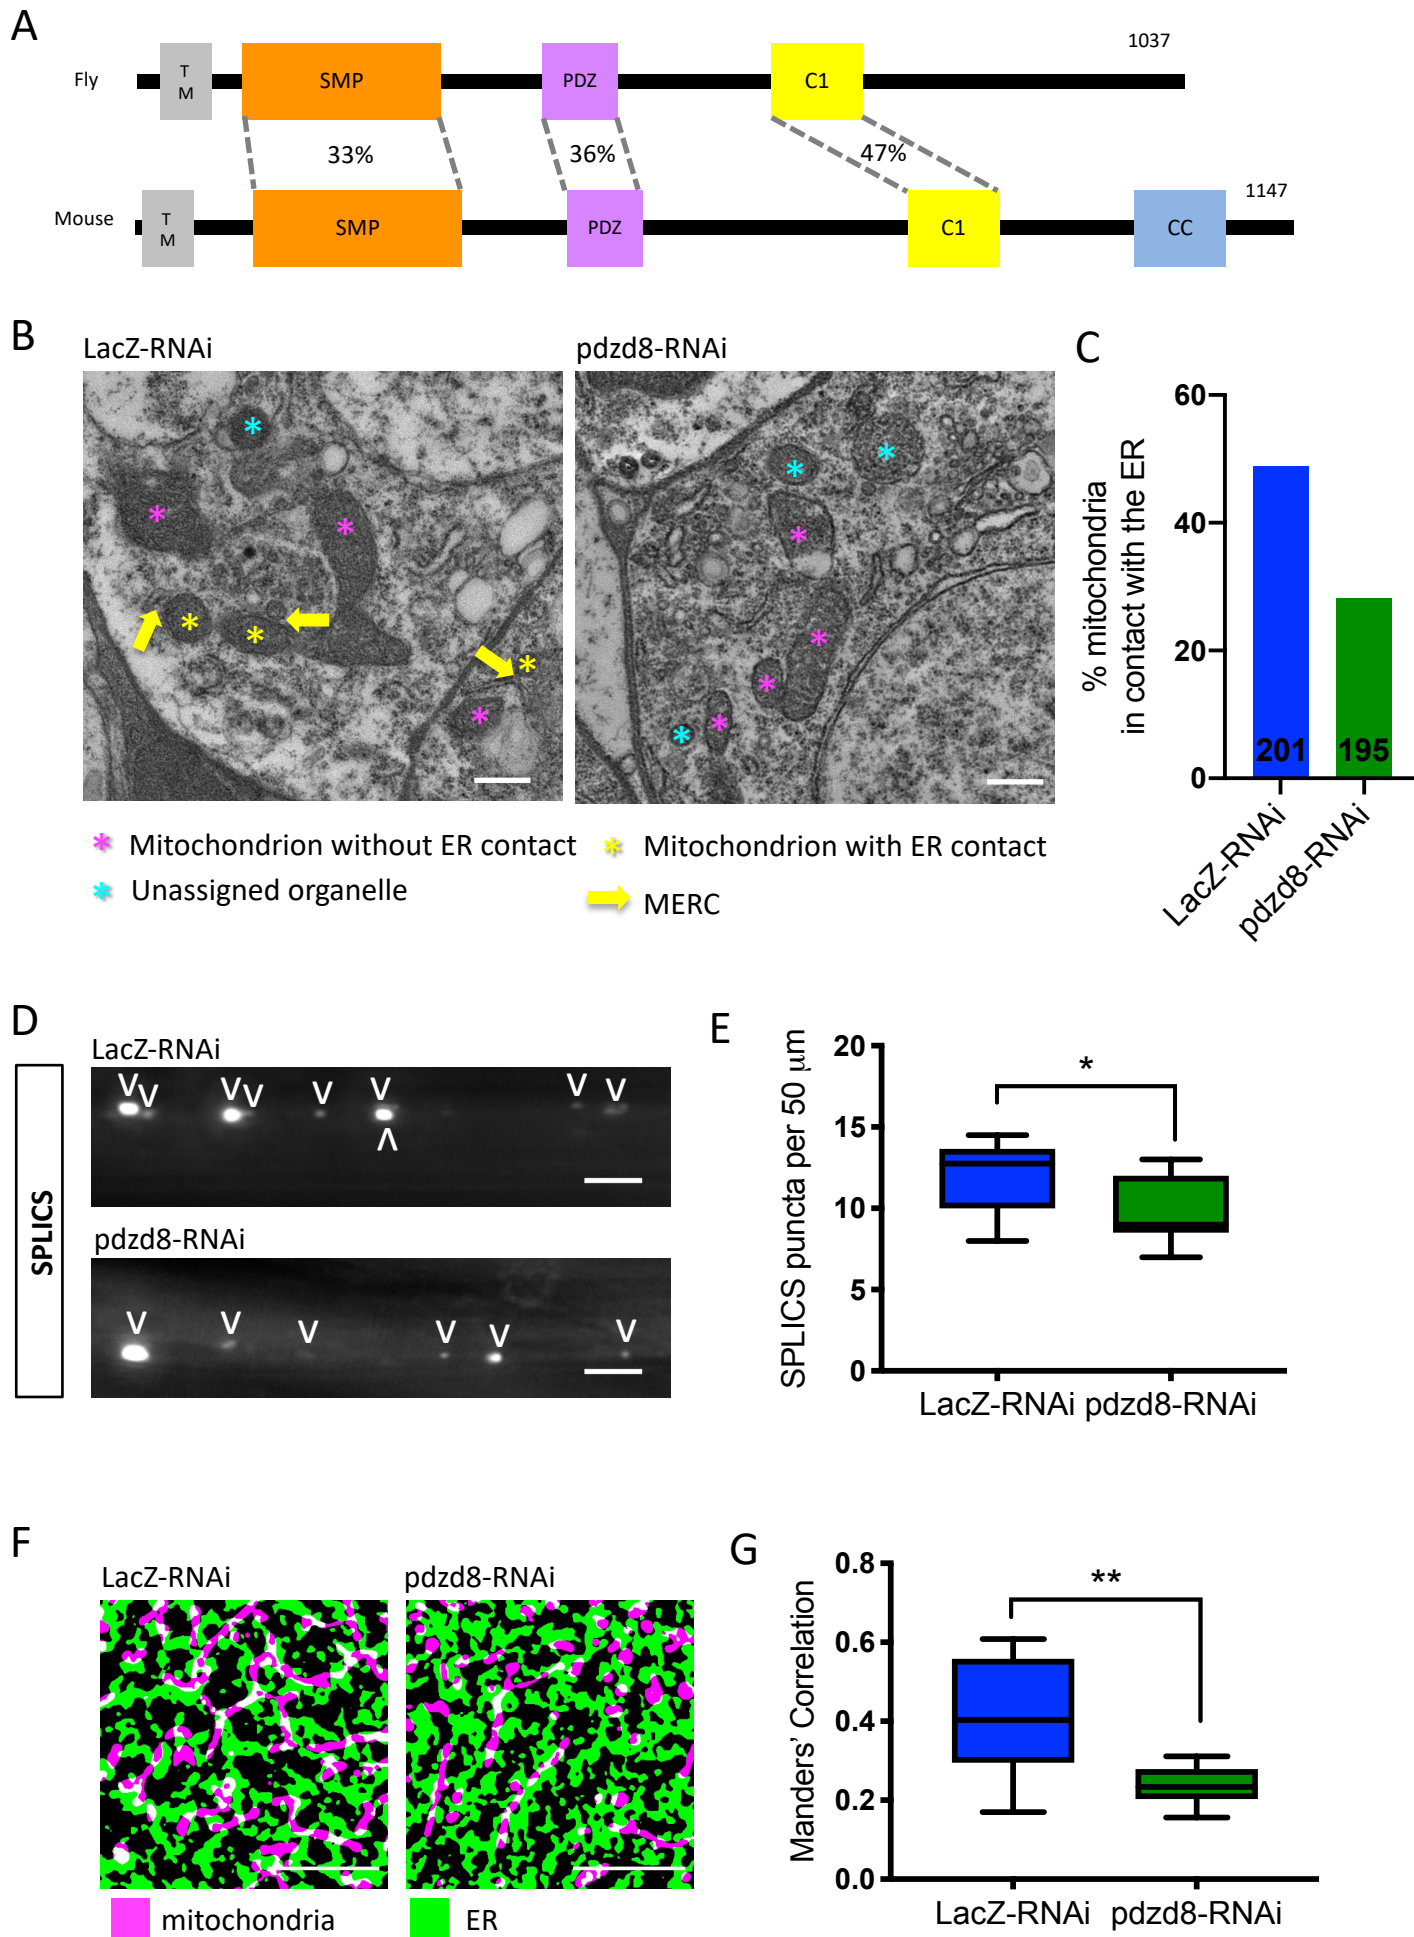

**Figure 2. Lifespan and locomotor activity changes in aged flies with pan-neuronal (nSyb) driven alterations in tethering.**

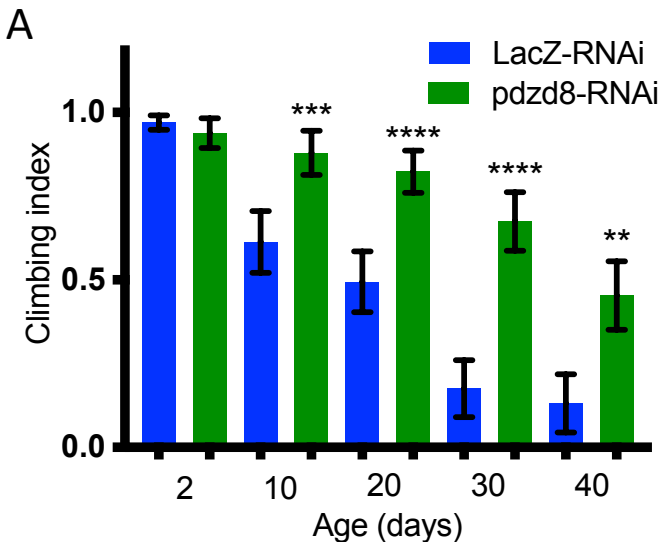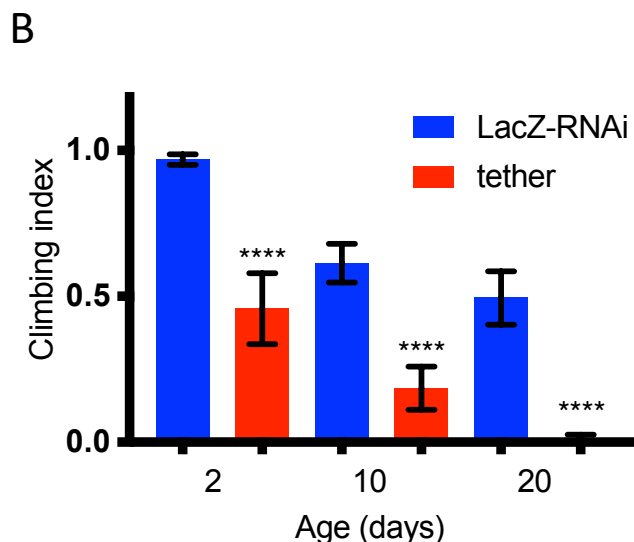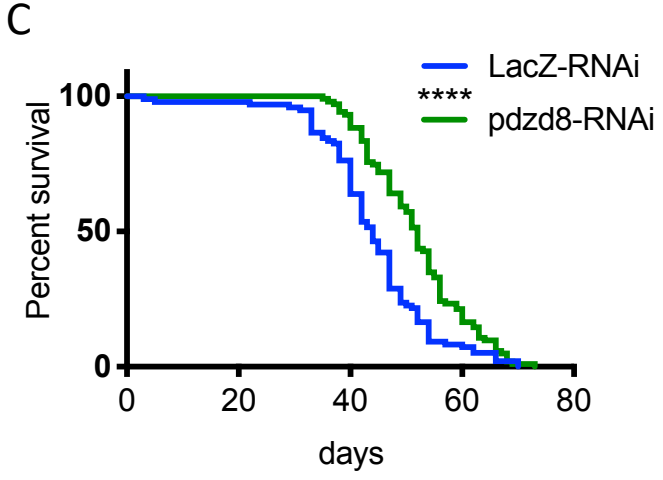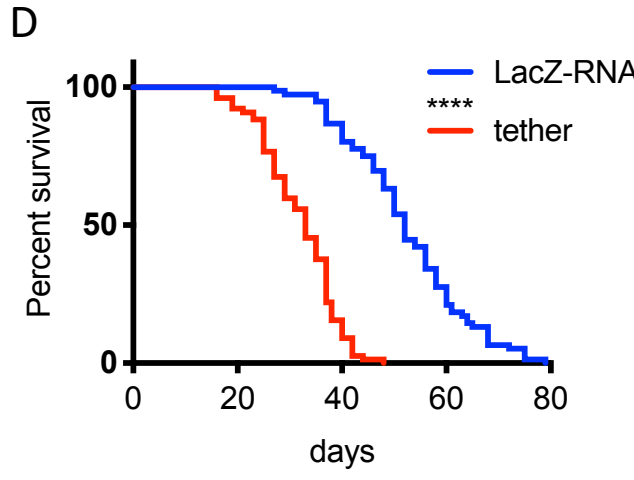

**Figure 3. Knockdown of *pdzd8* protects flies against mitochondrial toxins.**

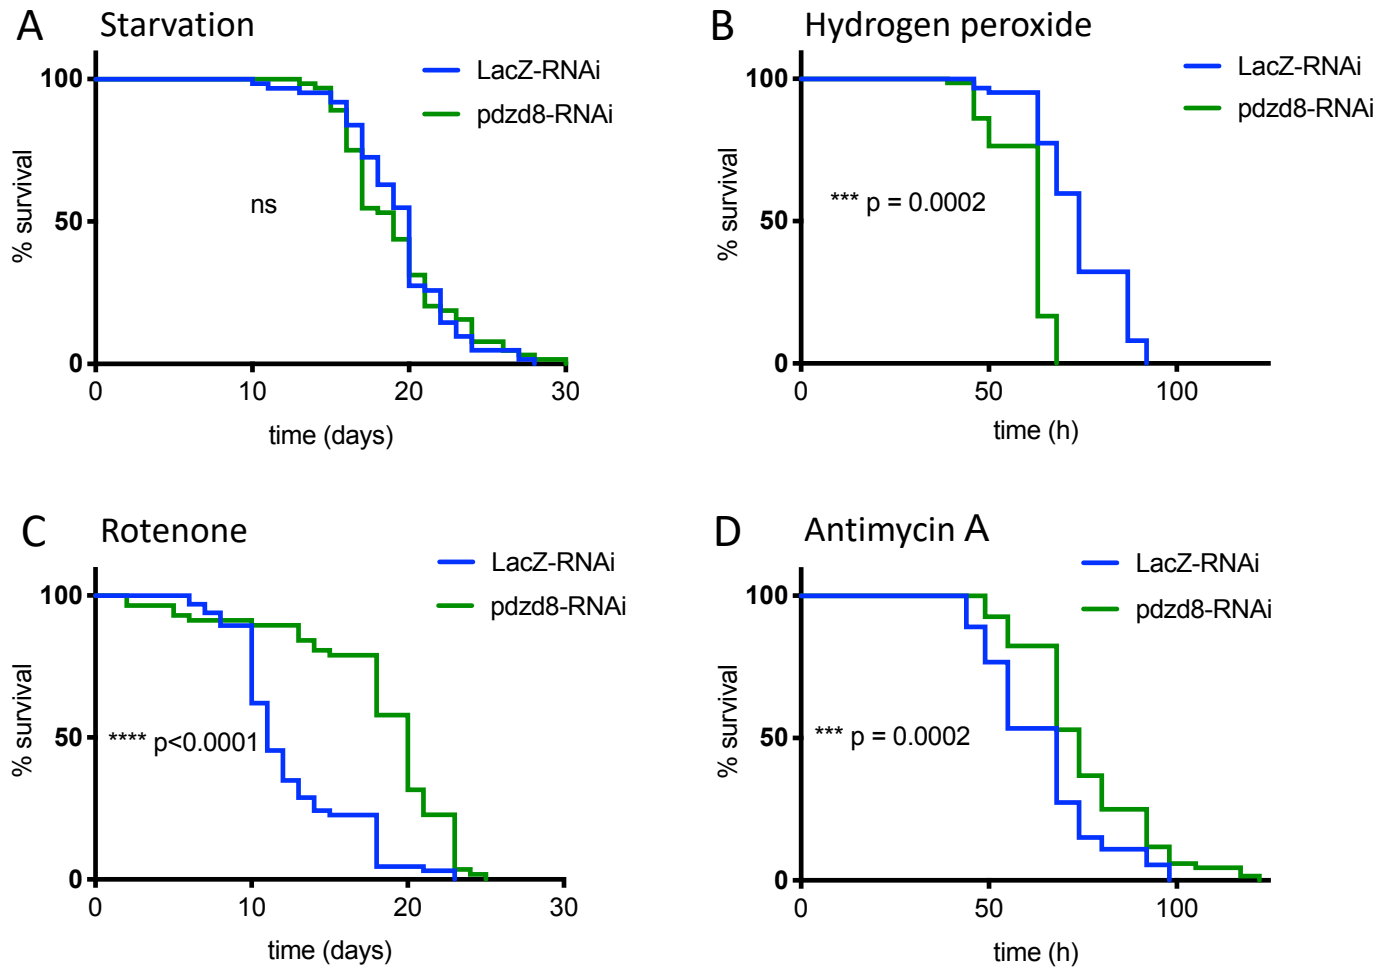

**Figure 4. Knockdown of *pdzd8* in larval neurons causes minor defects while increasing MERCs is detrimental to in axonal mitochondria size and motility.**

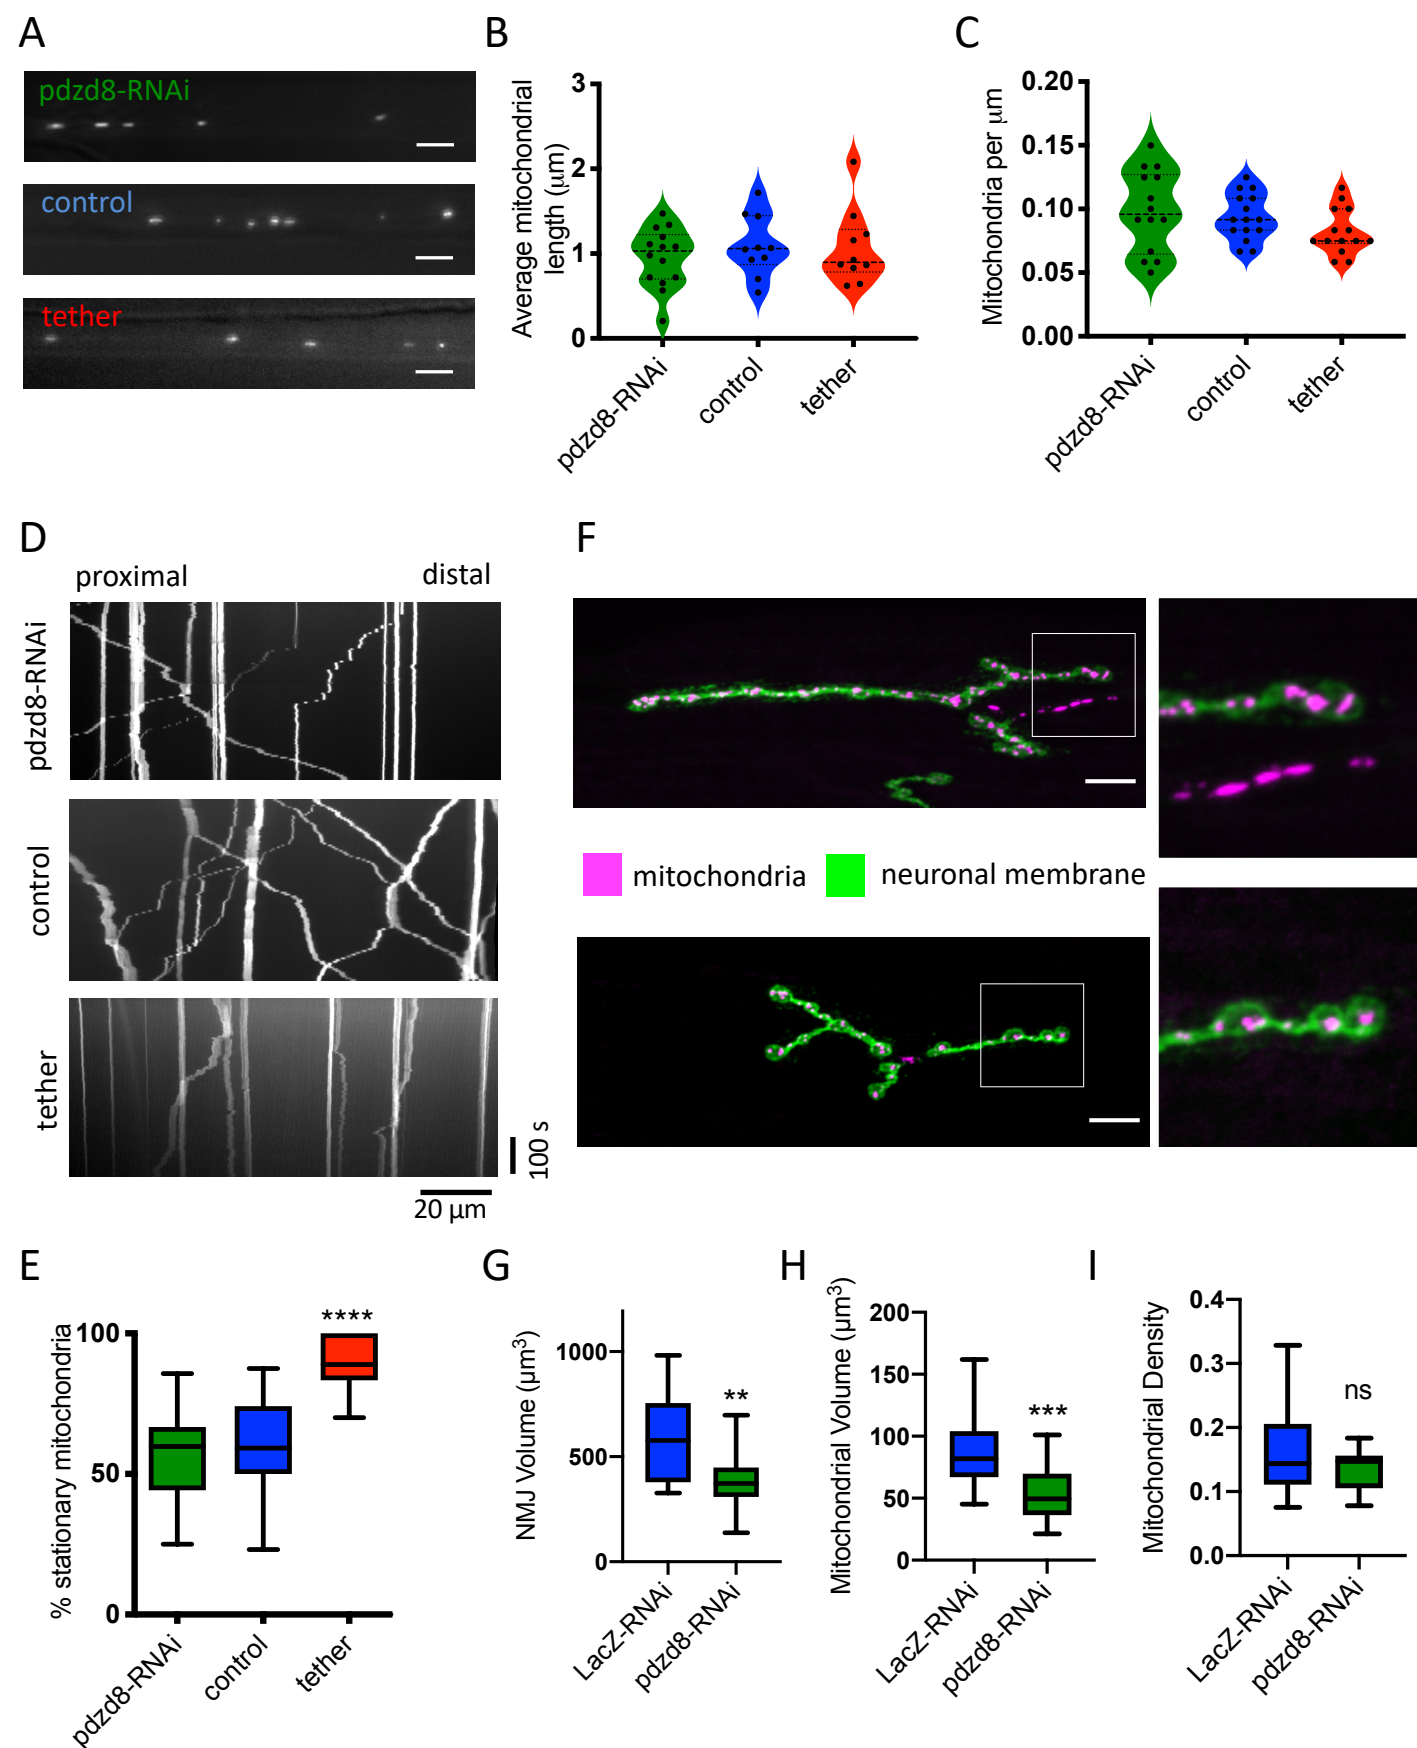



**Figure 5. Pan-neuronal *pdzd8*-RNAi increases mitophagy during aging.**

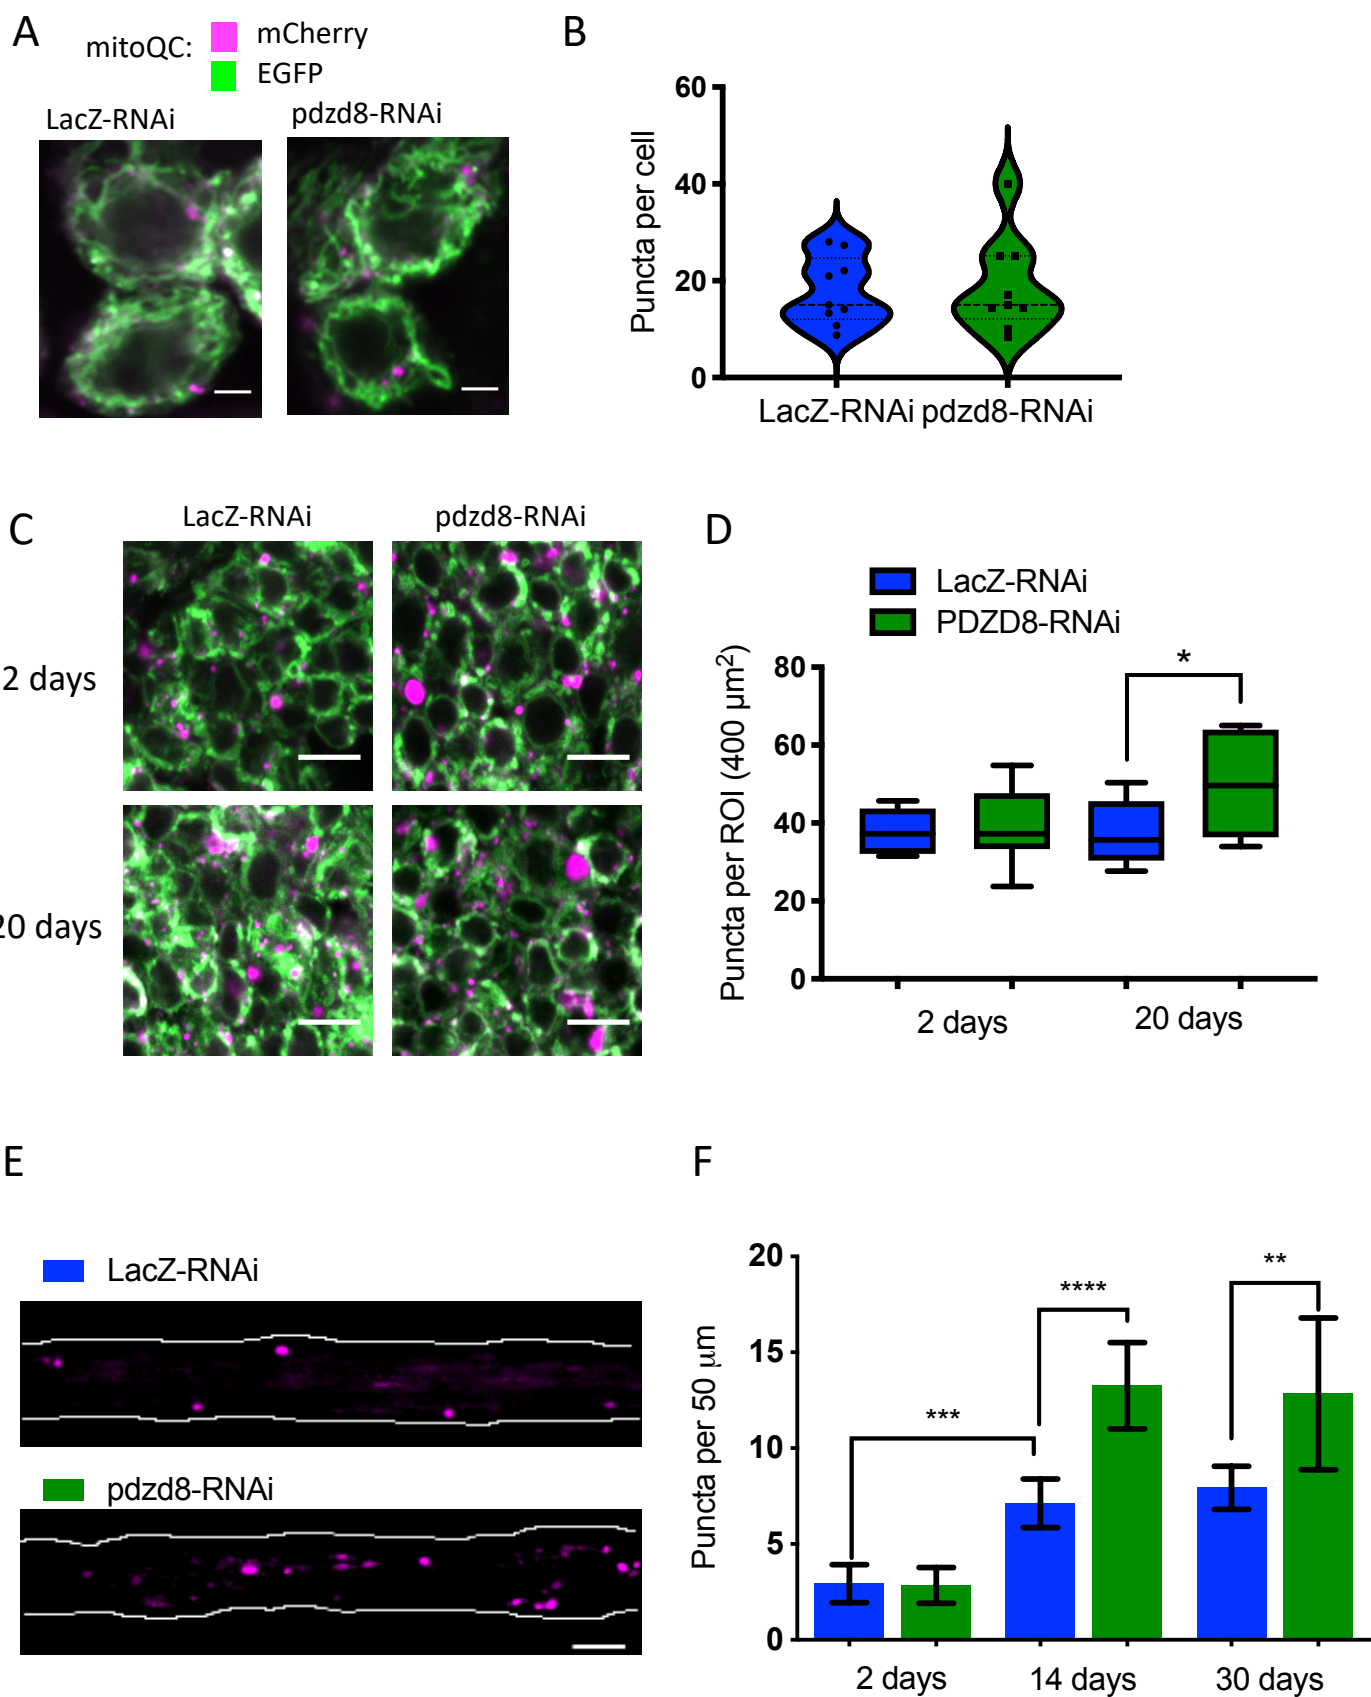

**Figure 6. Reducing pdzd8-mediated MERCs rescues the locomotor defects in an Alzheimer's disease *Drosophila* model.**

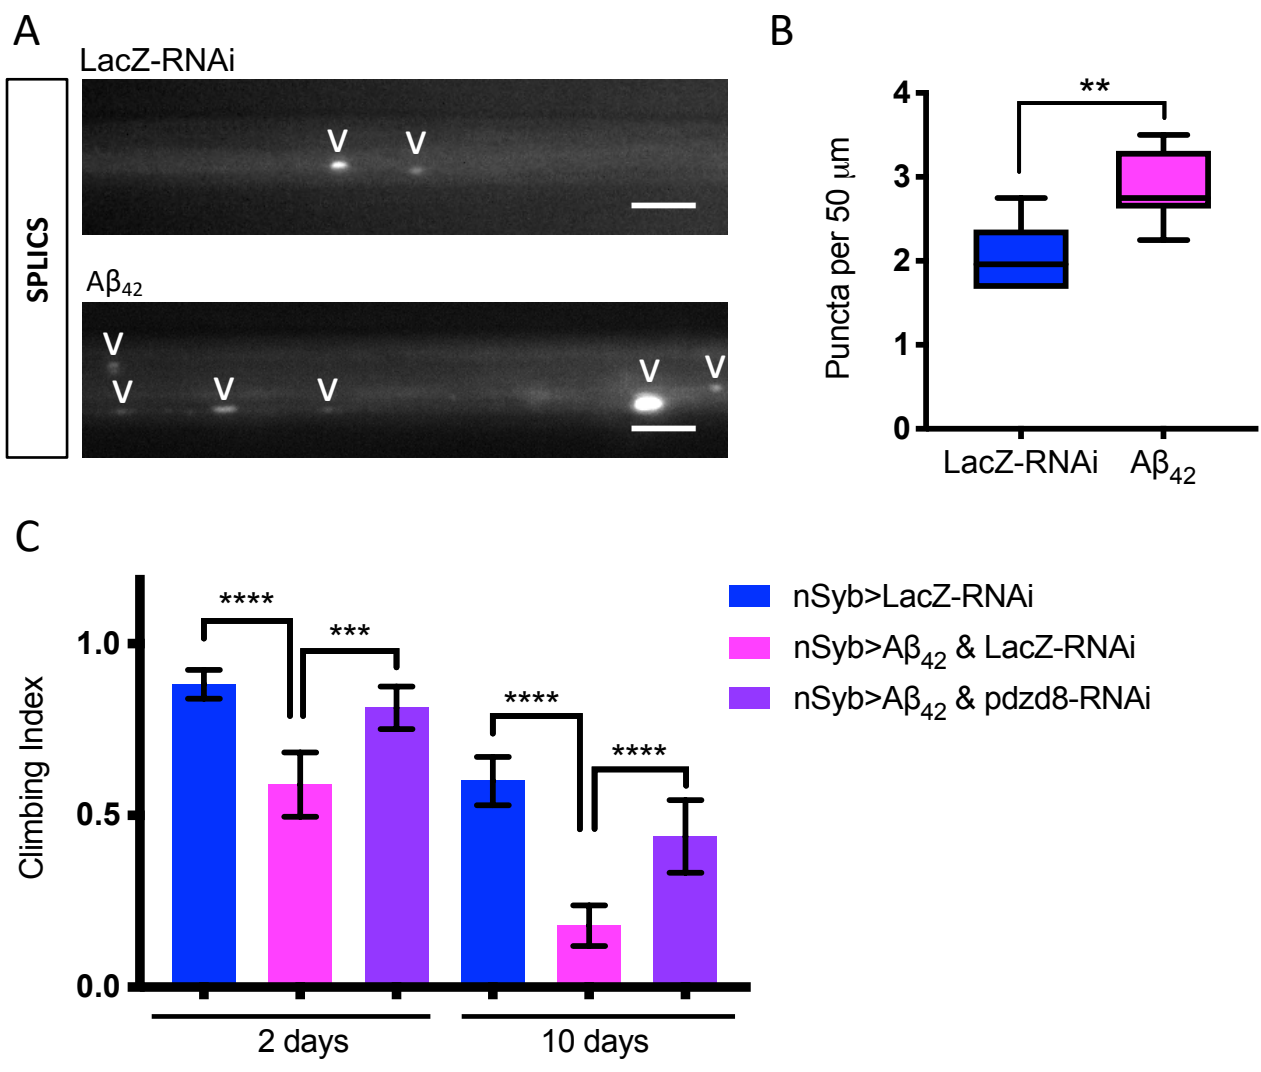

# Figure S1. Expression and tissue specificity of pdzd8.

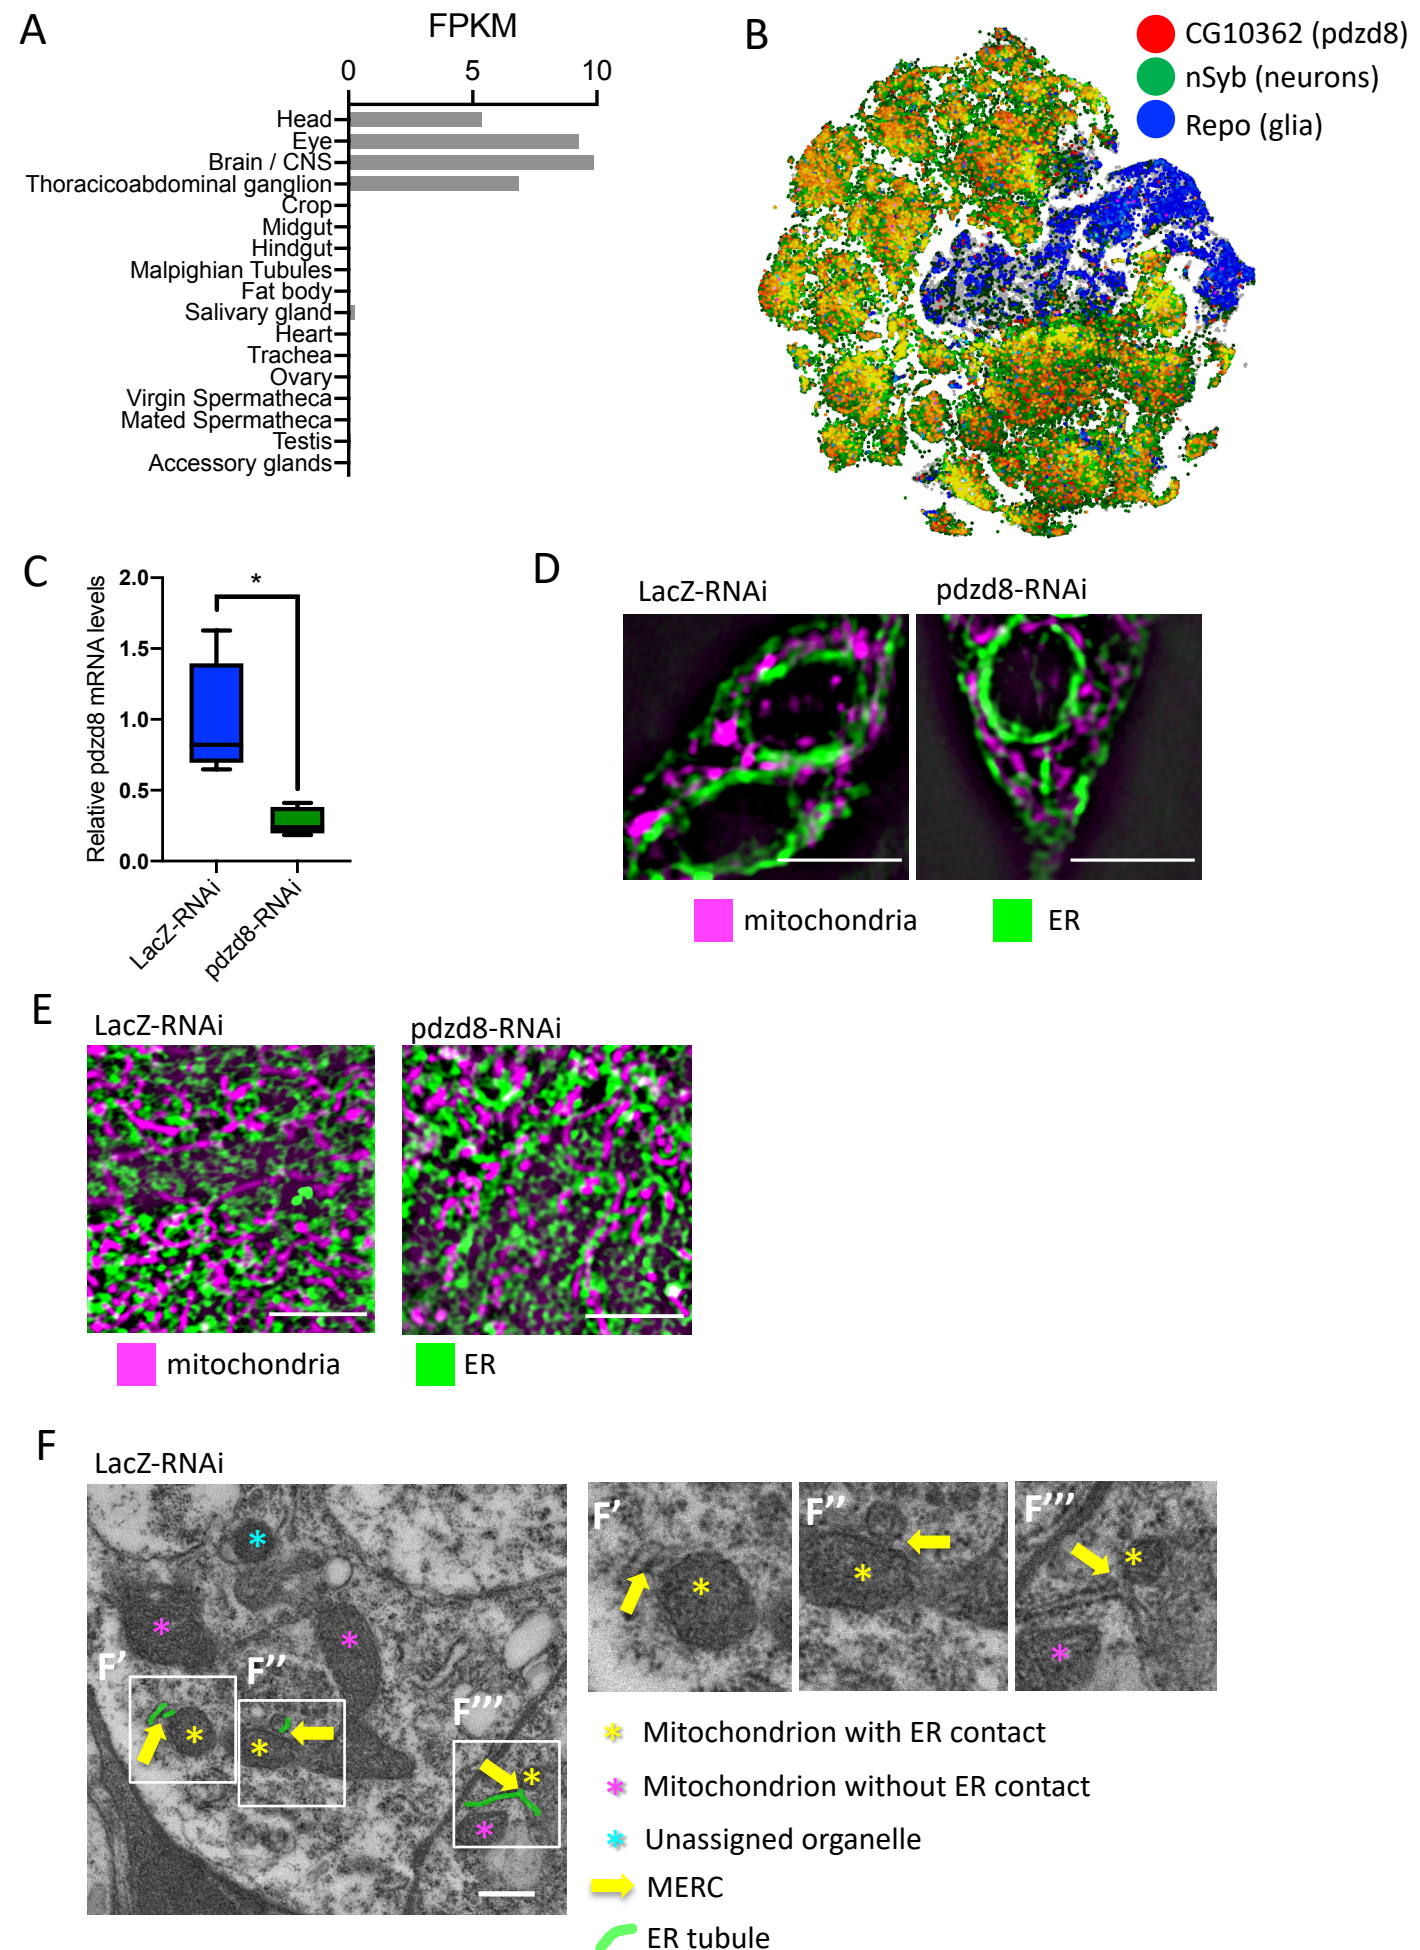

**Figure S2. SPLICS and tether constructs used in this study.**

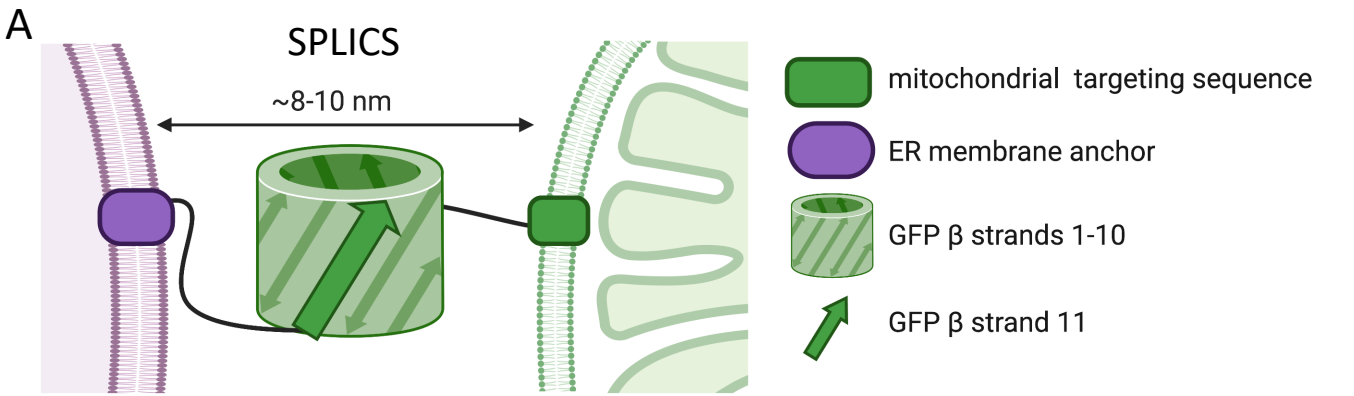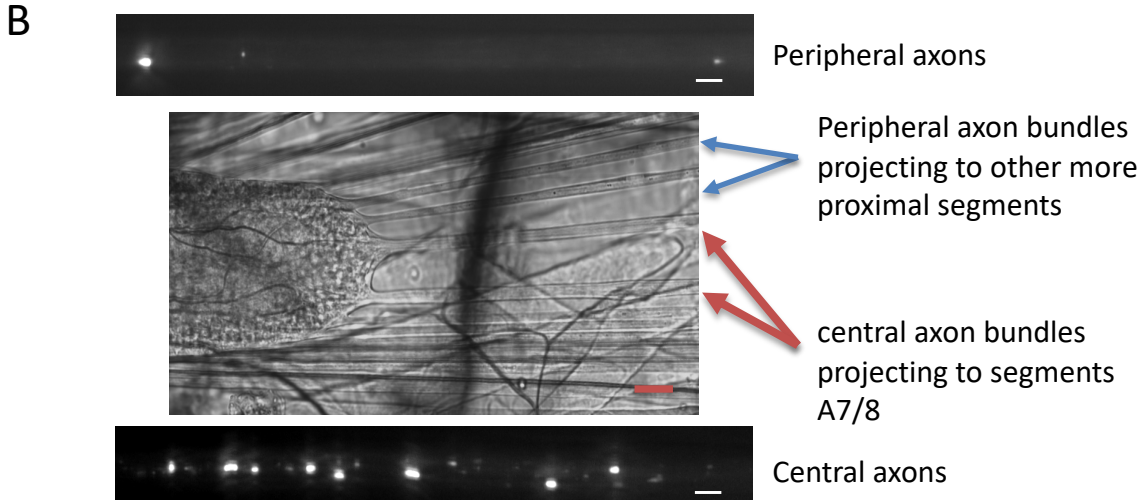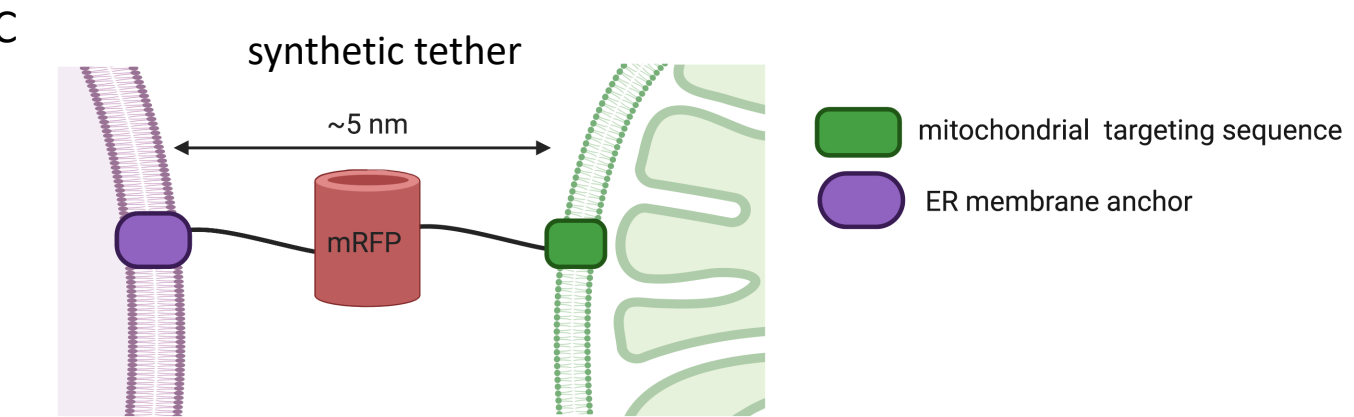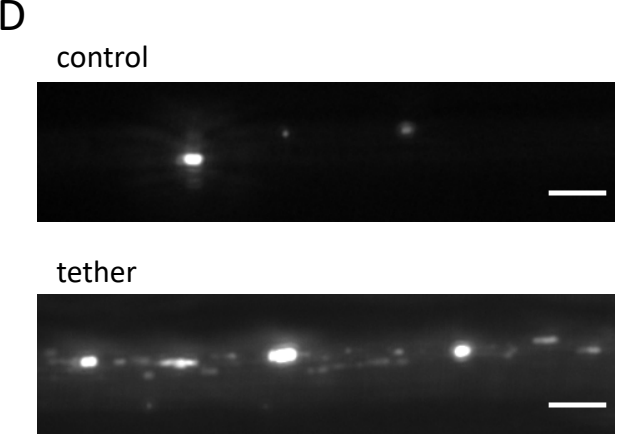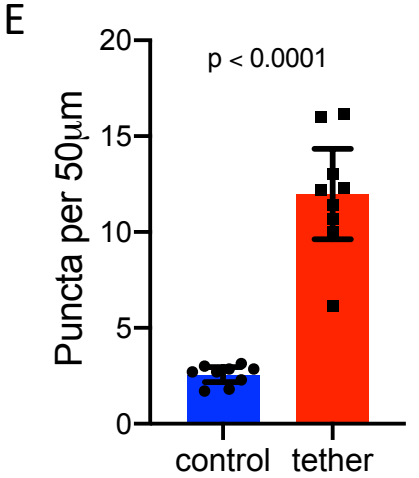



**Figure S3. Phenotypic characterization of altered tethering in motor neurons.**

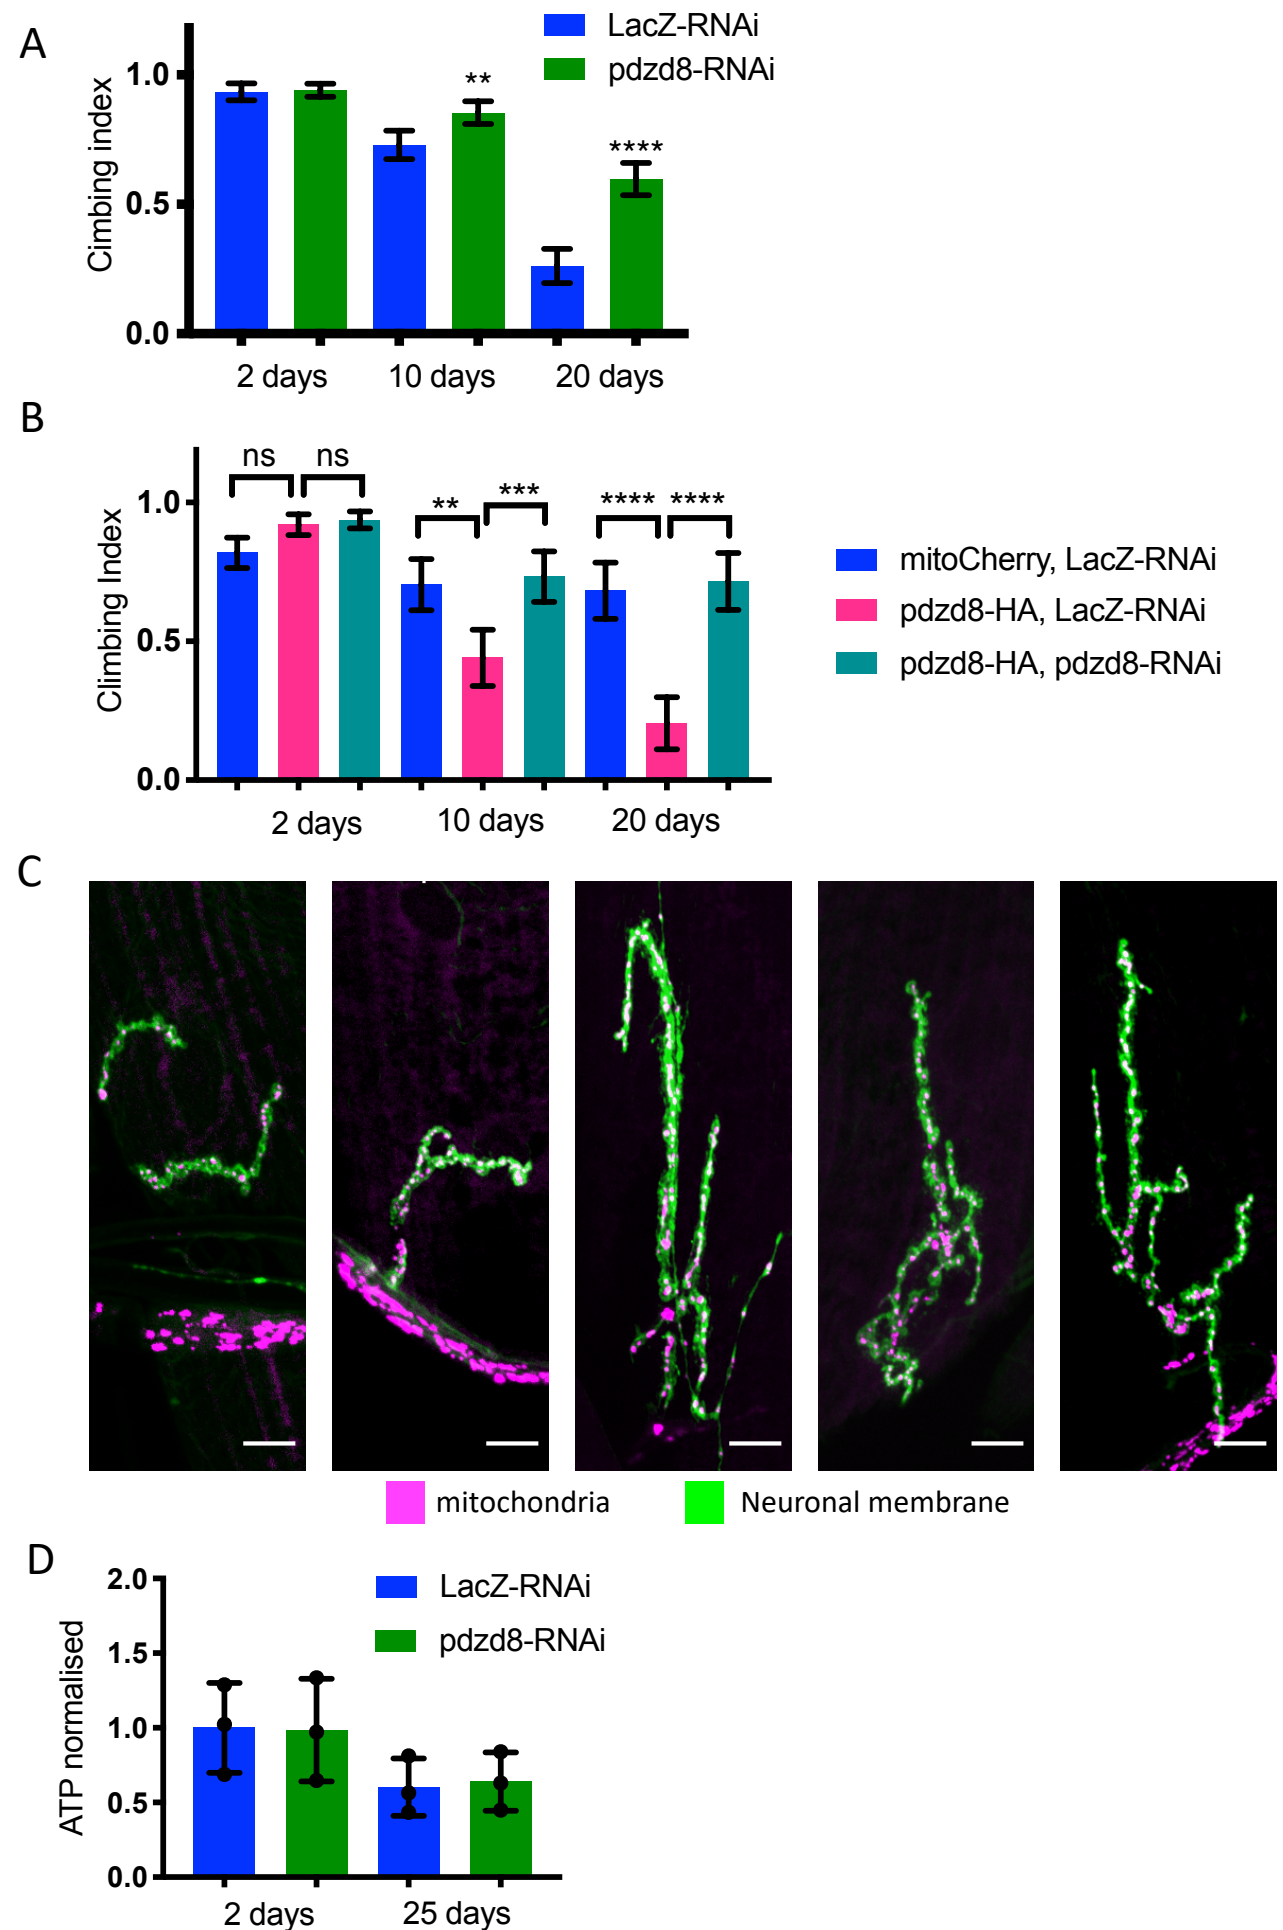

Source: https://www.biorxiv.org/content/10.1101/2020.11.14.382861v1.full.pdf
